# Supplementary material for: Blood coagulation system in patients with chronic kidney disease: a prospective observational study
Source: PubMed Central journal article supplement — BMJ Open. 2017 Jun 1;7(5):e014294. doi: 10.1136/bmjopen-2016-014294 (PMC5541338; doi:10.1136/bmjopen-2016-014294), 2017-06-01
Supplement: bmjopen-2016-014294.draft_revisions.pdf [file bmjopen-2016-014294.draft_revisions.pdf]

# BMJ Open

## Blood coagulation system in patients with chronic kidney disease: a prospective observational study

|                                 |                                                                                                                                                                                                                      |
|---------------------------------|----------------------------------------------------------------------------------------------------------------------------------------------------------------------------------------------------------------------|
| Journal:                        | <i>BMJ Open</i>                                                                                                                                                                                                      |
| Manuscript ID                   | bmjopen-2016-014294                                                                                                                                                                                                  |
| Article Type:                   | Research                                                                                                                                                                                                             |
| Date Submitted by the Author:   | 14-Sep-2016                                                                                                                                                                                                          |
| Complete List of Authors:       | Huang, Meng-Jie<br>Wei, Ri-bao<br>Wang, Yang<br>Su, Ting-yu<br>Di, Ping; Department of Clinical Laboratory, Chinese PLA General Hospital, Beijing, China<br>Li, Qing-ping<br>Yang, Xi<br>Li, Ping<br>Chen, Xiang-mei |
| <b>Primary Subject Heading</b>: | Urology                                                                                                                                                                                                              |
| Secondary Subject Heading:      | Renal medicine, Cardiovascular medicine                                                                                                                                                                              |
| Keywords:                       | Chronic kidney disease, Coagulation, Thrombotic events, Hypercoagulable state                                                                                                                                        |
|                                 |                                                                                                                                                                                                                      |

SCHOLARONE™  
Manuscripts

Only

1  
2  
3  
4 **Blood coagulation system in patients with chronic kidney disease: a prospective**  
5  
6 **observational study**  
7

8 Meng-Jie Huang<sup>a</sup>, Ri-bao Wei<sup>a\*</sup>, Yang Wang<sup>a</sup>, Ting-yu Su<sup>a</sup>, Ping Di<sup>b</sup>, Qing-ping Li<sup>a</sup>, Xi Yang<sup>a</sup>,  
9  
10 Ping Li<sup>a</sup>, Xiang-mei Chen<sup>a</sup>  
11

12  
13 <sup>a</sup>Department of Nephrology, Chinese PLA General Hospital, Chinese PLA Institute of  
14 Nephrology, State Key Laboratory of Kidney Diseases, National Clinical Research Center for  
15 Kidney Diseases, Beijing, China  
16  
17  
18  
19

20  
21 <sup>b</sup>Department of Clinical Laboratory, Chinese PLA General Hospital, Beijing, China  
22

23  
24 \*Corresponding author: Ri-bao Wei, MD, Department of Nephrology, Chinese PLA General  
25 Hospital, Chinese PLA Institute of Nephrology, State Key Laboratory of Kidney Diseases,  
26 National Clinical Research Center for Kidney Diseases, Beijing 100853, People's Republic of  
27  
28  
29  
30  
31 China  
32

33  
34 Email: wrbbj2006@126.com    Tel: 86-10-55499133    Fax: 86-10-88626068  
35

36 **Number of Words:** 2139  
37  
38  
39  
40  
41  
42  
43  
44  
45  
46  
47  
48  
49  
50  
51  
52  
53  
54  
55  
56  
57  
58  
59  
60

## Abstract

Objectives: Thromboembolic events are the major factor affecting the prognosis of chronic kidney disease (CKD) patients. Hemostatic alterations are possible causes of these complications, but their roles and profiles remain poorly characterized. In the prospective observational study, we investigated the entire coagulation process in CKD patients to elucidate the mechanisms underlying thrombophilia.

Methods: A total of 95 CKD patients and 20 healthy controls who met the inclusion criteria were consecutively recruited from September 2015 to March 2016. The platelet count, von Willebrand factor antigen (vWF:Ag), vWF ristocetin cofactor activity (vWF:RCo), fibrinogen, factor V (FV), FVII, FVIII, antithrombin III, protein C, protein S, D-dimer, standard coagulation tests, and thromboelastography were measured in the CKD patients and controls. Associations between the estimated glomerular filtration rate (eGFR) and hemostatic biomarkers were tested using multivariable linear regression.

Results: After adjustment for demographics and comorbidities, the vWF:Ag, vWF:RCo, fibrinogen, FVII, FVIII, and D-dimer levels were significantly higher in the CKD patients than in the healthy controls, and were elevated with CKD progression. However, the adjusted thromboelastography parameters showed no significant differences in the R, K, MA, and angle values between the CKD patients and healthy controls. In the correlation analysis, vWF Ag, vWF:RCo, and FVIII were clearly inversely associated with eGFR ( $r = -0.359$ ,  $P < 0.001$ ;  $r = -0.391$ ,  $P < 0.001$ ;  $r = -0.327$ ,  $P < 0.001$ , respectively).

Conclusions: CKD patients are characterized by endothelial dysfunction and enhanced coagulation, especially FVIII activity. The abnormal hemostatic profiles may contribute to the

1  
2  
3  
4 elevated risk of thrombotic events.  
5

6  
7 **Strengths and limitations of this study**

- 8  
9 ● Existing studies on the mechanism of coagulation in CKD are mostly limited to  
10 hemodialysis patients with end-stage renal disease. The changes in the coagulation  
11 function of non-dialysis patients with moderate to severe CKD have not been completely  
12 clarified. In our research article, we investigated the entire coagulation process in  
13 non-dialysis CKD patients.  
14  
15  
16  
17  
18  
19  
20  
21 ● We found that CKD patients are characterized by endothelial dysfunction and enhanced  
22 coagulation, especially FVIII activity. Besides, we also performed thromboelastography  
23 for dynamic observation of the entire coagulation process in CKD patients but detected  
24 no changes in the coagulation function.  
25  
26  
27  
28  
29  
30  
31 ● Our study is limited by the limited methods available for platelet function testing at our  
32 center. We did not verify platelet function changes in the CKD patients apart from  
33 thromboelastography. Also, the present study was a cross-sectional study that did not  
34 follow-up the patients or establish a relationship between the elevation of procoagulant  
35 factors and eventual subsequent thromboembolic events in the CKD patients.  
36  
37  
38  
39  
40  
41  
42  
43  
44  
45  
46  
47  
48  
49  
50  
51  
52  
53  
54  
55  
56  
57  
58  
59  
60

## ***Introduction***

Chronic kidney disease (CKD) patients commonly have blood coagulation disorders. The resulting thrombotic complications have become the most common cause of death and one of the difficulties in renal replacement therapy among CKD patients.<sup>1-4</sup> Existing studies on the mechanism of coagulation in CKD are mostly limited to hemodialysis patients with end-stage renal disease (ESRD).<sup>5-7</sup> The changes in the coagulation function of non-dialysis patients with moderate to severe CKD have not been completely clarified.

The coagulation process involves the participation of the platelets, vascular endothelium, coagulation system, anticoagulant system, and fibrinolytic system. Most coagulation test methods reflect changes in a particular blood coagulation step but have difficulty completely verifying the entire coagulation process in CKD patients. In the present study, several coagulation test methods were used to measure markers of endothelial function [von Willebrand factor antigen (vWF:Ag) and vWF ristocetin cofactor activity (vWF:RCo)], the major blood coagulation pathways [fibrinogen, factor V (FV), FVII, and FVIII], and natural coagulation inhibitors (antithrombin III, protein S and protein C). Additionally, standard coagulation tests and thromboelastography (TEG) were adopted for dynamic observation of the entire coagulation process. The purpose of the study was to investigate the entire coagulation process in non-dialysis patients at different CKD stages to elucidate the mechanisms underlying thrombophilia and guide antithrombotic treatment.

## ***Methods***

### ***1. Study design and subjects***

1  
2  
3  
4 This prospective observational study was performed at the Department of Nephrology,  
5  
6 Chinese PLA General Hospital. Between September 2015 and March 2016, consecutive  
7  
8 patients 18 to 70 years of age with CKD who were not receiving dialysis were included in  
9  
10 this study. The exclusion criteria were as follows: (1) patients with secondary renal disease  
11  
12 [diabetic nephropathy, lupus nephritis, or antineutrophil cytoplasmic autoantibody  
13  
14 (ANCA)-associated vasculitis]; (2) patients with nephrotic syndrome; (3) patients with signs  
15  
16 of acute infection, liver failure, trauma, surgery, cancer, or pregnancy; (4) patients on  
17  
18 glucocorticoids, immunosuppressive medication and anticoagulant medication within the past  
19  
20 month; and (5) patients with a history of previous thromboembolic or hemorrhagic events.  
21  
22 Finally, 95 patients with CKD met the exclusion criteria and agreed to participate in the study.  
23  
24 Additionally, 20 age- and gender-matched healthy controls with no history of kidney disease  
25  
26 who met the same exclusion criteria were recruited. Informed consent was obtained from all  
27  
28 individuals included in this study and the research was approved by the ethics committee of  
29  
30 the General Hospital of the Chinese People's Liberation Army. A flowchart is shown in  
31  
32 Figure 1.  
33  
34  
35  
36  
37  
38  
39

#### 40 **Figure 1. The flow chart of this study**

#### 41 **2. General data collection**

42  
43 We recorded the subjects' general conditions (age, gender, height, weight, systolic blood  
44  
45 pressure, diastolic blood pressure, and smoking history), underlying diseases [coronary heart  
46  
47 disease (CHD) and diabetes mellitus], and laboratory parameters [hemoglobin, white blood  
48  
49 cell count, platelet count, serum albumin, serum creatinine, cholesterol, triglycerides, and  
50  
51 urinary albumin to creatinine ratio (UACR)].  
52  
53  
54  
55  
56  
57  
58  
59  
60

1  
2  
3  
4 We also calculated the body mass index (BMI) and mean arterial pressure (MAP) as  
5  
6 follows:  $BMI = \text{weight (kg)}/[\text{height (m)}]^2$  and  $MAP = (\text{systolic blood pressure} + 2 \cdot \text{diastolic}$   
7  
8  $\text{blood pressure})/3$ .  
9

10  
11 The Chronic Kidney Disease Epidemiology Collaboration (CKD-EPI) equation was used  
12  
13 to estimate the glomerular filtration rate (eGFR).<sup>8</sup> The CKD stage was defined according to  
14  
15 the Kidney Disease Outcomes Quality Initiative (KDOQI) guidelines.<sup>9</sup>  
16  
17

### 18 **3. Procoagulant and anticoagulant factors**

19  
20 Fasting cubital venous blood specimens were collected in the morning and mixed with  
21  
22 109 mmol/L sodium citrate for anticoagulation (sodium citrate: blood = 1:9). The blood  
23  
24 samples were centrifuged at 3000 x g for 10 min within 1 h of collection to obtain  
25  
26 platelet-poor plasma. Factor V, VII, and VIII activities as well as the anticoagulant factors  
27  
28 protein C and protein S were analyzed by clotting assays. vWF:Ag and vWF:RCo were  
29  
30 measured by immunoturbidimetric assay. All instruments (ACL TOP700) and reagents were  
31  
32 purchased from USA Instrumentation Laboratory Company.  
33  
34  
35  
36  
37  
38

### 39 **4. Standard coagulation tests**

40  
41 The activated partial thromboplastin time (APTT), prothrombin time (PT), and  
42  
43 fibrinogen were analyzed by the magnetic bead assay. Antithrombin III was analyzed by the  
44  
45 chromogenic substrate assay. The D-dimer content was measured by immunoturbidimetry  
46  
47 using a device and reagents purchased from Stago (France).  
48  
49

### 50 **5. Thromboelastography (TEG)**

51  
52 The coagulation status was assessed via TEG using citrated whole blood samples. For  
53  
54 each TEG assay, citrated whole blood (1 ml) was pipetted into a vial containing 1% kaolin  
55  
56  
57  
58  
59  
60

1  
2  
3  
4 and inverted 5 times to ensure mixing of kaolin with the blood. Then, 340  $\mu\text{l}$  of  
5  
6 kaolin-activated citrated whole blood was transferred to a TEG cup to which 20  $\mu\text{l}$  of 0.2  
7  
8 mol/l  $\text{CaCl}_2$  had been preloaded for recalcification. The TEG analyzer was stopped 40-60  
9  
10 minutes after reaching the maximum amplitude at 37°C. The parameters included (1) reaction  
11  
12 time (R) - time from the start of the test to a TEG amplitude of 2 mm, reflecting the combined  
13  
14 effect of the coagulation factors involved in the initiation of hemostasis; (2) K-time (K) - the  
15  
16 period from the TEG amplitude of 2 mm to when the curve reached an amplitude of 20 mm,  
17  
18 which measured the rate of clot formation (fibrin cross-linking); (3)  $\alpha$ -angle - the angle  
19  
20 between the tangent line (drawn from the split point to the curve) and the horizontal base line,  
21  
22 representing the acceleration of fibrin build-up and cross-linking; and (4) maximum  
23  
24 amplitude (MA) - indicative of the strength of the clot that reflected the cross interaction  
25  
26 between platelet functions and coagulation.  
27  
28  
29  
30  
31  
32

### 33 34 **6. Statistical analysis**

35  
36 Data analysis was performed using SPSS software, version 19.0 (Chicago, IL, USA). The  
37  
38 results are expressed as the mean  $\pm$  standard deviation or the median (range) for continuous  
39  
40 data and as a frequency or percentage for categorical data. We initially compared baseline  
41  
42 characteristics among the CKD patients and healthy controls using analysis of variance  
43  
44 (ANOVA), Kruskal-Wallis test or Chi-squared test as appropriate. A generalized linear model  
45  
46 estimating procedure was used to obtain adjusted mean levels of procoagulant biomarkers  
47  
48 within renal function categories. Using multivariable linear regression, we examined the  
49  
50 association of eGFR with hemostatic biomarkers. eGFR and other baseline characteristics  
51  
52  
53  
54  
55  
56  
57  
58  
59  
60



were the independent variables and the biomarkers were the dependent variables in these analyses. P values less than 0.05 were considered statistically significant.

## Results

### Participants' characteristics

Baseline characteristics of the CKD patients and healthy controls are shown in Table 1. No significant differences were detected in age, gender ratio, BMI, white blood cell, or cholesterol between the CKD patients and healthy controls. Subjects with CKD stage 5 (CKD 5) had higher MAP, triglyceride, and UACR but lower hemoglobin and serum albumin levels than the healthy controls. Given the small number of subjects with concomitant CHD, diabetes mellitus, and smoking in the CKD and healthy control groups, we combined CKD stage 3–5 patients for comparison with the healthy controls. However, no significant differences were found between the CKD patients and healthy controls regarding CHD, diabetes mellitus, or smoking ratio.

**Table 1. Characteristics of CKD patients and healthy controls**

| Variables                 | Healthy control         | CKD3                    | CKD4                     | CKD5        | P      |
|---------------------------|-------------------------|-------------------------|--------------------------|-------------|--------|
| No. of patients           | 20                      | 32                      | 38                       | 25          |        |
| Gender, M, n (%)          | 9(47%)                  | 22(69%)                 | 25(66%)                  | 13(52%)     | 0.225  |
| Age (year)                | 39.7±16.7               | 40.3±11.3               | 44.5±14.4                | 44.0±13.7   | 0.443  |
| BMI (kg/ m <sup>2</sup> ) | 23.3±4.3                | 24.4±4.2                | 24.7±3.6                 | 23.8±4.2    | 0.582  |
| MAP (mmHg)                | 89.5±9.3 <sup>♦</sup>   | 95.0±9.4 <sup>♦</sup>   | 97.5±8.5 <sup>♦</sup>    | 103.8±17.2* | <0.001 |
| Hemoglobin (g/L)          | 136.3±17.4 <sup>♦</sup> | 131.2±20.2 <sup>♦</sup> | 118.9±18.1 <sup>*♦</sup> | 98.5±14.2*  | <0.001 |

|                                    |                         |                           |                           |              |        |
|------------------------------------|-------------------------|---------------------------|---------------------------|--------------|--------|
| White blood cell ( $10^9/l$ )      | 6.1±1.6                 | 7.1±2.1                   | 7.1±1.5                   | 6.9±2.2      | 0.398  |
| Serum albumin (g/L)                | 43.2±2.9 <sup>♦</sup>   | 41.1±3.4                  | 40.7±3.4                  | 39.1±3.6*    | 0.004  |
| Serum creatinine (umol/l)          | 69.4±13.5 <sup>♦</sup>  | 155.5±31.5* <sup>♦</sup>  | 265.7±63.4* <sup>♦</sup>  | 542.1±237.1* | <0.001 |
| eGFR (ml/min/1.73 m <sup>2</sup> ) | 101.4±21.9 <sup>♦</sup> | 48.9±13.9* <sup>♦</sup>   | 24.7±6.3* <sup>♦</sup>    | 10.9±4.1*    | <0.001 |
| Cholesterol (mmol/l)               | 4.2±0.9                 | 4.2±1.2                   | 4.2±0.8                   | 4.0±0.9      | 0.959  |
| Triglyceride (mmol/l)              | 1.2±0.6                 | 1.9±0.9*                  | 2.3±1.1* <sup>♦</sup>     | 1.7±0.8      | 0.003  |
| UACR (mg/g)                        | 7.3±2.7 <sup>♦</sup>    | 201.9±142.7* <sup>♦</sup> | 313.8±139.5* <sup>♦</sup> | 472.2±224.1* | <0.001 |
| CHD, n (%)                         | 2 (10%)                 | 1 (3%)                    | 3 (8%)                    | 1 (4%)       | 0.753  |
| Diabetes Mellitus, n (%)           | 1(5%)                   | 2 (6%)                    | 3 (8%)                    | 3 (11%)      | 0.523  |
| Current smoking,n (%)              | 2(10%)                  | 7 (21%)                   | 6 (15%)                   | 1 (4%)       | 0.457  |

Data are expressed as mean±standard deviation (SD) or median (interquartile range) as appropriate ; BMI=body mass index; MAP=mean arterial pressure; eGFR=estimated glomerular filtration rate; UACR=Urine Albumin/Creatinine ratio; CHD=coronary artery disease.

\*p<0.05, vs control group;

<sup>♦</sup>p<0.05, vs CKD 5 group.

1  
2  
3  
4  
5  
6  
7  
8  
9  
10  
11  
12  
13  
14  
15  
16  
17  
18  
19  
20  
21  
22  
23  
24  
25  
26  
27  
28  
29  
30  
31  
32  
33  
34  
35  
36  
37  
38  
39  
40  
41  
42  
43  
44  
45  
46  
47  
48  
49  
50  
51  
52  
53  
54  
55  
56  
57  
58  
59  
60

For peer review only

1  
2  
3  
4  
5  
6  
7  
8  
9  
10  
11  
12  
13  
14  
15  
16  
17  
18  
19  
20  
21  
22  
23  
24  
25  
26  
27  
28  
29  
30  
31  
32  
33  
34  
35  
36  
37  
38  
39  
40  
41  
42  
43  
44  
45  
46  
47  
48  
49

**Procoagulant biomarkers according to chronic kidney disease**

Table 2 shows the unadjusted and adjusted means of the procoagulant biomarkers by CKD status. The FVII, FVIII, vWF:Ag, vWF:RCo, fibrinogen, and D-dimer levels were significantly higher in the CKD patients than in the controls after adjustment for age, gender, history of diabetes, history of CHD, smoking status, MAP, BMI, hemoglobin, serum albumin, cholesterol, triglyceride, and UACR. With the exception of FVII, all of these parameters were elevated with CKD progression. Prior to adjustment, protein C was significantly lower in the CKD 5 patients than in the controls; however, after adjustment, no significant difference was found in this parameter between groups (P=0.736). Irrespective of the adjustment, platelet count, FV, antithrombin III, APTT, and PT showed no significant differences between the CKD 3–5 patients and the healthy controls.

**Table 2. Unadjusted and adjusted levels of procoagulant biomarkers.**

| Variables                     | Unadjusted      |            |            |            |       | Multivariable-adjusted* |            |            |            |       |
|-------------------------------|-----------------|------------|------------|------------|-------|-------------------------|------------|------------|------------|-------|
|                               | Healthy control | CKD3       | CKD4       | CKD5       | P     | Healthy control         | CKD3       | CKD4       | CKD5       | P     |
| Platelet (10 <sup>9</sup> /l) | 237.2±47.4      | 214.8±65.0 | 214.0±52.8 | 195.8±58.6 | 0.156 | 239.3±72.4              | 218.1±60.5 | 211.4±57.9 | 186.3±71.9 | 0.284 |

|    |                 |                         |                          |                       |             |        |                        |                          |                          |             |        |
|----|-----------------|-------------------------|--------------------------|-----------------------|-------------|--------|------------------------|--------------------------|--------------------------|-------------|--------|
| 1  |                 |                         |                          |                       |             |        |                        |                          |                          |             |        |
| 2  |                 |                         |                          |                       |             |        |                        |                          |                          |             |        |
| 3  |                 |                         |                          |                       |             |        |                        |                          |                          |             |        |
| 4  |                 |                         |                          |                       |             |        |                        |                          |                          |             |        |
| 5  |                 |                         |                          |                       |             |        |                        |                          |                          |             |        |
| 6  |                 |                         |                          |                       |             |        |                        |                          |                          |             |        |
| 7  | Factor V (%)    | 113.6±26.1              | 98.4±31.9                | 106.7±36.9            | 103.4±33.3  | 0.533  | 108.3±38.5             | 99.7±35.0                | 108.0±32.6               | 99.6±40.3   | 0.640  |
| 8  |                 |                         |                          |                       |             |        |                        |                          |                          |             |        |
| 9  | Factor VII(%)   | 74.2±14.3 <sup>♦</sup>  | 94.5±18.0 <sup>*♦</sup>  | 104.2±17.9*           | 108.4±27.2* | <0.001 | 78.8±25.2 <sup>♦</sup> | 99.4±23.4*               | 104.0±20.9 <sup>*♦</sup> | 97.7±27.4*  | 0.050  |
| 10 |                 |                         |                          |                       |             |        |                        |                          |                          |             |        |
| 11 | Factor VIII(%)  | 86.5±22.3 <sup>♦</sup>  | 115.3±25.1 <sup>*♦</sup> | 130.5±27.6*           | 139.9±33.0* | <0.001 | 82.3±31.6 <sup>♦</sup> | 118.2±28.9 <sup>*♦</sup> | 129.7±27.1*              | 141.1±32.8* | <0.001 |
| 12 |                 |                         |                          |                       |             |        |                        |                          |                          |             |        |
| 13 | VWF:Ag(%)       | 103.1±42.4 <sup>♦</sup> | 124.7±51.4 <sup>♦</sup>  | 158.9±49.9*           | 181.8±45.6* | <0.001 | 92.9±51.4 <sup>♦</sup> | 131.0±51.1 <sup>*♦</sup> | 155.8±46.2*              | 182.9±56.4* | 0.011  |
| 14 |                 |                         |                          |                       |             |        |                        |                          |                          |             |        |
| 15 | VWF:RCo(%)      | 99.8±29.9 <sup>♦</sup>  | 115.5±43.2 <sup>♦</sup>  | 150.2±45.1*           | 168.2±41.5* | <0.001 | 86.4±44.1 <sup>♦</sup> | 120.9±44.1 <sup>*♦</sup> | 147.9±40.0*              | 170.0±48.8* | 0.004  |
| 16 |                 |                         |                          |                       |             |        |                        |                          |                          |             |        |
| 17 | Fibrinogen(g/l) | 3.0±0.8 <sup>♦</sup>    | 3.1±0.7 <sup>♦</sup>     | 3.8±0.8 <sup>*♦</sup> | 4.5±1.1*    | <0.001 | 3.7±1.0 <sup>♦</sup>   | 3.2±0.9 <sup>*♦</sup>    | 3.7±0.9 <sup>♦</sup>     | 4.2±1.0*    | 0.006  |
| 18 |                 |                         |                          |                       |             |        |                        |                          |                          |             |        |
| 19 | Protein C(%)    | 105.3±17.0 <sup>♦</sup> | 99.4±18.6 <sup>♦</sup>   | 93.5±17.9             | 86.6±15.2*  | 0.024  | 98.2±19.2              | 97.1±16.6                | 92.5±15.5                | 93.3±19.6   | 0.736  |
| 20 |                 |                         |                          |                       |             |        |                        |                          |                          |             |        |
| 21 | Protein S(%)    | 76.8±23.2               | 88.2±24.6                | 94.5±20.7             | 99.5±25.5   | 0.076  | 83.7±29.1              | 87.1±25.8                | 93.4±23.5                | 99.4±30.0   | 0.584  |
| 22 |                 |                         |                          |                       |             |        |                        |                          |                          |             |        |
| 23 | AT III (%)      | 99.5±9.3                | 103.8±12.2               | 103.8±11.7            | 103.1±11.8  | 0.658  | 99.2±12.9              | 104.7±11.3               | 104.2±10.4               | 99.2±12.9   | 0.189  |
| 24 |                 |                         |                          |                       |             |        |                        |                          |                          |             |        |
| 25 | D-dimer,(ng/ml) | 257±116 <sup>♦</sup>    | 425±277 <sup>♦</sup>     | 505±320 <sup>*♦</sup> | 842±496*    | <0.001 | 362±404 <sup>♦</sup>   | 464±367 <sup>♦</sup>     | 505±345 <sup>*♦</sup>    | 780±422*    | 0.039  |
| 26 |                 |                         |                          |                       |             |        |                        |                          |                          |             |        |
| 27 | APTT(s)         | 39.0±4.5                | 37.7±3.2                 | 37.5±3.7              | 39.0±4.2    | 0.286  | 40.5±4.8               | 37.8±3.9                 | 37.5±3.6                 | 38.2±4.8    | 0.187  |
| 28 |                 |                         |                          |                       |             |        |                        |                          |                          |             |        |
| 29 | PT(s)           | 13.4±0.6                | 13.5±0.6                 | 13.5±0.6              | 13.7±0.6    | 0.320  | 13.7±0.7               | 13.5±0.5                 | 13.5±0.6                 | 13.8±0.7    | 0.192  |
| 30 |                 |                         |                          |                       |             |        |                        |                          |                          |             |        |
| 31 |                 |                         |                          |                       |             |        |                        |                          |                          |             |        |
| 32 |                 |                         |                          |                       |             |        |                        |                          |                          |             |        |
| 33 |                 |                         |                          |                       |             |        |                        |                          |                          |             |        |
| 34 |                 |                         |                          |                       |             |        |                        |                          |                          |             |        |
| 35 |                 |                         |                          |                       |             |        |                        |                          |                          |             |        |
| 36 |                 |                         |                          |                       |             |        |                        |                          |                          |             |        |
| 37 |                 |                         |                          |                       |             |        |                        |                          |                          |             |        |
| 38 |                 |                         |                          |                       |             |        |                        |                          |                          |             |        |
| 39 |                 |                         |                          |                       |             |        |                        |                          |                          |             |        |
| 40 |                 |                         |                          |                       |             |        |                        |                          |                          |             |        |
| 41 |                 |                         |                          |                       |             |        |                        |                          |                          |             |        |
| 42 |                 |                         |                          |                       |             |        |                        |                          |                          |             |        |
| 43 |                 |                         |                          |                       |             |        |                        |                          |                          |             |        |
| 44 |                 |                         |                          |                       |             |        |                        |                          |                          |             |        |
| 45 |                 |                         |                          |                       |             |        |                        |                          |                          |             |        |
| 46 |                 |                         |                          |                       |             |        |                        |                          |                          |             |        |
| 47 |                 |                         |                          |                       |             |        |                        |                          |                          |             |        |
| 48 |                 |                         |                          |                       |             |        |                        |                          |                          |             |        |
| 49 |                 |                         |                          |                       |             |        |                        |                          |                          |             |        |

1  
2  
3  
4  
5  
6  
7 Data are adjusted for age, sex, history of diabetes, history of CHD, smoking status, MAP, BMI, hemoglobin, serum albumin, cholesterol,  
8 triglyceride, and UACR.  
9

10  
11  
12 AT III=antithrombin III; APTT=activated partial thromboplastin time; PT=prothrombin time.  
13

14 \*p<0.05, vs control group;      ♦p<0.05, vs CKD 5 group.  
15  
16  
17  
18  
19  
20  
21  
22  
23  
24  
25  
26  
27  
28  
29  
30  
31  
32  
33  
34  
35  
36  
37  
38  
39  
40  
41  
42  
43  
44  
45  
46  
47  
48  
49

### *Thromboelastography*

Figure 2 compares the unadjusted and adjusted TEG parameters between the CKD patients and the healthy controls. The results showed that the R time and K time in the unadjusted cohort were hypercoagulable in the CKD 4–5 patients compared with the CKD 3 patients and the healthy controls ( $p < 0.05$ ). The MA values in the CKD 5 group were significantly higher than the values in the control group ( $63.3 \pm 9.3$  mm versus  $57.9 \pm 5.7$  mm,  $p=0.046$ ). However, after adjustment for relevant factors, no significant differences were found in the R, K, MA, and a-angle values between the CKD patients and the healthy controls.

#### **Figure 2. Unadjusted and adjusted TEG parameters in healthy controls, CKD3-5 stage.**

Data are adjusted for age, sex, history of diabetes, history of CHD, smoking status, MAP, BMI, hemoglobin, serum albumin, cholesterol, triglyceride, and UACR.

(A) Unadjusted and Adjusted R value. (B) Unadjusted and Adjusted K value. (C) Unadjusted and Adjusted MA value. (D) Unadjusted and Adjusted  $\alpha$ -angle value.

\* $p < 0.05$ , vs control group;  $\blacklozenge p < 0.05$ , vs CKD 5 group.

#### ***Associations between renal function and hemostatic biomarkers***

As shown in Figure 3, vWF Ag, vWF:RCo, FVIII were inversely correlated with eGFR ( $r = -0.359$ ,  $P=0.001$ ;  $r = -0.391$ ,  $P < 0.001$ ;  $r = -0.327$ ,  $P=0.001$ ). Besides, we also used multivariable linear regression to analyze the associations between eGFR and hemostatic biomarkers. Table 3 presents multivariate-adjusted regression

coefficients (95% confidence intervals). In the multivariate-adjusted models, higher vWF Ag, vWF:RCo, FVIII were significantly associated with a decreased eGFR.

**Figure 3. Correlation of vWF Ag, vWF:RCo, and FVIII levels with eGFR.**

(A) Correlation of vWF Ag with eGFR. (B) Correlation of vWF:RCo with eGFR. (C) Correlation of FVIII with eGFR.

**Table 3. Multivariable-Adjusted Regression Coefficients (95% Confidence Intervals) of hemostatic biomarkers with eGFR.**

|             | eGFR, mL/min/1.73 m <sup>2</sup> |         |
|-------------|----------------------------------|---------|
|             | Effect size (95% CI)             | p-value |
| Factor VIII | -0.50 (-0.69, -0.31)             | <0.001  |
| VWF:Ag      | -0.92(-1.33, -0.40)              | <0.001  |
| vWF:RCo     | -0.82 (-1.19, -0.45)             | <0.001  |

\*Adjusted for age, sex, history of diabetes, history of CHD, smoking status, MAP, BMI, hemoglobin, serum albumin, eGFR, cholesterol, triglyceride, and UACR.

**Discussion**

We evaluated the coagulation profiles in CKD patients who were not receiving dialysis using multiple laboratory methods, including the vascular endothelium, coagulation factor, anticoagulation system, conventional blood test, standard coagulation tests, and TEG.

VWF, which is a large molecular weight glycoprotein synthesized and secreted by endothelial cells and megakaryocytes, exerts a procoagulant effect through platelet



1  
2  
3  
4 adhesion and aggregation and FVIII stabilization.<sup>10</sup> The increased vWF is a sign of  
5  
6 endothelial injury and a risk for thromboembolic events.<sup>11, 12</sup> Fibrinogen, FVII, and  
7  
8 FVIII are important coagulation factors in the coagulation pathway, whereas D-dimer  
9  
10 reflects the activation of the coagulation system and the formation of blood clots in  
11  
12 the body. Fibrinogen, FVII, FVIII, and D-dimer have also been shown to be  
13  
14 associated with an increased prevalence of thromboembolic events.<sup>13-16</sup>  
15  
16

17  
18  
19 In our study, we observed elevated D-dimer, fibrinogen, factor VII, and especially  
20  
21 factor VIII and vWF levels in CKD patients. And the coagulation was enhanced with  
22  
23 the aggravation of renal injury. CKD patients often present higher levels of traditional  
24  
25 risk factors for thromboembolic events, such as hypertension, diabetes, obesity and  
26  
27 dyslipidemia;<sup>17</sup> these factors also affect the coagulation system. In our attempt to  
28  
29 explain hemostatic alterations in chronic kidney disease, we adjusted for the above  
30  
31 influencing factors. The results showed that procoagulant factors were still  
32  
33 significantly elevated in the CKD patients, indicating that kidney dysfunction affected  
34  
35 the activation of coagulation function in addition to traditional risk factors.  
36  
37  
38  
39

40  
41 Possible mechanisms to explain the association of lower eGFR and higher levels  
42  
43 of hemostatic factors are as follows. (1) With CKD progression, renal impairment is  
44  
45 aggravated and a large number of renal units are damaged, resulting in the loss of  
46  
47 normal excretory function and a reduction in the removal of procoagulant substances.  
48  
49 A few studies found that the metabolism and elimination of fibrinogen and D-dimer  
50  
51 were decreased in CKD and ESRD.<sup>18-20</sup> (2) The increase in the FVII level may be due  
52  
53 to vascular endothelial damage in CKD patients, resulting in tissue factor  
54  
55  
56  
57  
58  
59  
60

1  
2  
3  
4 expression.<sup>21</sup> (3) Moreover, extensive research has found that vWF, fibrinogen, and  
5  
6 FVIII are associated with the inflammatory response.<sup>22</sup> CKD patients are commonly  
7  
8 associated with changes in the levels of various inflammatory cytokines.<sup>23</sup>  
9  
10 Proinflammatory substances can activate procoagulant factors and result in elevated  
11  
12 levels of particular hemostatic factors.  
13  
14

15  
16 TEG displays blood clot formation dynamics from initial thrombin generation to  
17  
18 fibrinolysis.<sup>24</sup> In the current study, we also performed TEG for dynamic observation  
19  
20 of the entire coagulation process in CKD patients. Prior to adjustment for  
21  
22 confounding factors, the TEG data suggested that all aspects of coagulation were  
23  
24 increased in the CKD patients, including initial fibrin formation, fibrin-platelet  
25  
26 interactions, and qualitative platelet functions. However, after adjustment for relevant  
27  
28 influencing factors, we found no significant differences in the TEG parameters (R, K,  
29  
30 MA, and angle) between the CKD patients and the healthy controls, which is in  
31  
32 contrast to previous TEG studies in hemodialysis patients with ESRD.<sup>25, 26</sup>  
33  
34 Hemodialysis patients are influenced by hemodynamic factors and coagulant use and  
35  
36 thus present more complicated changes in coagulation functions, which are different  
37  
38 from those in non-dialysis CKD patients.<sup>5</sup> Thus, whether TEG can be used to  
39  
40 effectively evaluate the integrated coagulation function in non-dialysis CKD patients  
41  
42 requires further validation.  
43  
44  
45  
46  
47  
48  
49

50  
51 The present study has certain limitations. First, platelet dysfunction was  
52  
53 previously thought to play a role in coagulation disorders among CKD patients.  
54  
55 However, due to the limited methods available for platelet function testing at our  
56  
57  
58  
59  
60

1  
2  
3  
4 center, we did not verify platelet function changes in the CKD patients or thoroughly  
5  
6 explore the role of platelets apart from TEG. Second, the present study was a  
7  
8 cross-sectional study that did not follow-up the patients or establish a relationship  
9  
10 between the elevation of procoagulant factors and eventual subsequent  
11  
12 thromboembolic events in the CKD patients.  
13  
14

### 15 16 **Conclusions**

17  
18 In conclusion, CKD patients are characterized by endothelial dysfunction and  
19  
20 enhanced coagulation, especially FVIII activity. The abnormal hemostatic profiles  
21  
22 may contribute to the elevated risk of thrombotic events. TEG detected no changes in  
23  
24 the coagulation function among the CKD patients. Whether TEG can effectively  
25  
26 evaluate the integrated coagulation function in CKD patients needs to be verified  
27  
28 using larger samples. Future studies are required to target the role of coagulation  
29  
30 management for CKD patients to reduce co-morbidities.  
31  
32  
33  
34

35  
36 **Contributors:** H-MJ. W-RB and C-XM created and designed this study. H-MJ. W Y.  
37  
38 S-TY. L-QP and Y X collected and analysed the data. H-MJ. W-RB. D P and L P  
39  
40 contributed to the preparation and editing of the manuscript.  
41  
42  
43

44  
45 **Funding:** This work was supported in by the National Sciences Foundation of China  
46  
47 [grant numbers 81273968, 81471027 and 81401160]; Ministerial projects of the  
48  
49 National Working Commission on Aging [grant number QLB2014W002]; and The  
50  
51 Four hundred project of 301[grant number YS201408].  
52

53  
54 **Competing interests:** We declare that the authors do not have any potential conflicts  
55  
56 of interest.  
57  
58  
59  
60

1  
2  
3  
4 **Data Sharing:** No Data available

5  
6 **Reference**

- 7  
8  
9 1. Liang CC, Wang SM, Kuo HL, et al. Upper gastrointestinal bleeding in patients  
10 with CKD. *Clin J Am Soc Nephrol* 2014;9:1354-9.  
11  
12  
13 2. Wattanakit K, Cushman M, Stehman-Breen C, et al. Chronic kidney disease  
14 increases risk for venous thromboembolism. *J Am Soc Nephrol* 2008;19:135-40.  
15  
16  
17 3. Bos MJ, Koudstaal PJ, Hofman A, et al. Decreased glomerular filtration rate is a  
18 risk factor for hemorrhagic but not for ischemic stroke: the Rotterdam Study. *Stroke*  
19 2007;38:3127-32.  
20  
21  
22 4. Foley RN, Parfrey PS, Sarnak MJ. Clinical epidemiology of cardiovascular  
23 disease in chronic renal disease. *Am J Kidney Dis* 1998;32:S112-9.  
24  
25  
26 5. Darlington A, Ferreiro JL, Ueno M, et al. Haemostatic profiles assessed by  
27 thromboelastography in patients with end-stage renal disease. *Thromb Haemost*  
28 2011;106:67-74.  
29  
30  
31 6. Molino D, De Lucia D, Gaspare De Santo N. Coagulation disorders in uremia.  
32 *Semin Nephrol* 2006;26:46-51.  
33  
34  
35 7. Vaziri ND, Gonzales EC, Wang J, et al. Blood coagulation, fibrinolytic, and  
36 inhibitory proteins in end-stage renal disease: effect of hemodialysis. *Am J Kidney Dis*  
37 1994;23:828-35.  
38  
39  
40 8. Levey AS, Stevens LA, Schmid CH, et al. A new equation to estimate glomerular  
41 filtration rate. *Ann Intern Med* 2009;150:604-12.  
42  
43  
44  
45  
46  
47  
48  
49  
50  
51  
52  
53  
54  
55  
56  
57  
58  
59  
60

- 1  
2  
3  
4 9. K/DOQI clinical practice guidelines for chronic kidney disease: evaluation,  
5  
6 classification, and stratification. *Am J Kidney Dis* 2002;39:S1-266.  
7  
8  
9 10. Beguin S, Kumar R, Keularts I, et al. Fibrin-dependent platelet procoagulant  
10  
11 activity requires GPIb receptors and von Willebrand factor. *Blood* 1999;93:564-70.  
12  
13  
14 11. Danesh J, Wheeler JG, Hirschfield GM, et al. C-reactive protein and other  
15  
16 circulating markers of inflammation in the prediction of coronary heart disease. *N*  
17  
18 *Engl J Med* 2004;350:1387-97.  
19  
20  
21 12. Rumley A, Lowe GD, Sweetnam PM, et al. Factor VIII, von Willebrand factor  
22  
23 and the risk of major ischaemic heart disease in the Caerphilly Heart Study. *Br J*  
24  
25 *Haematol* 1999;105:110-6.  
26  
27  
28  
29 13. Kirmizis D, Tsiandoulas A, Pangalou M, et al. Validity of plasma fibrinogen,  
30  
31 D-dimer, and the von Willebrand factor as markers of cardiovascular morbidity in  
32  
33 patients on chronic hemodialysis. *Med Sci Monit* 2006;12:Cr55-62.  
34  
35  
36  
37 14. Bash LD, Erlinger TP, Coresh J, et al. Inflammation, hemostasis, and the risk of  
38  
39 kidney function decline in the Atherosclerosis Risk in Communities (ARIC) Study.  
40  
41 *Am J Kidney Dis* 2009;53:596-605.  
42  
43  
44 15. Folsom AR, Delaney JA, Lutsey PL, et al. Associations of factor VIIIc, D-dimer,  
45  
46 and plasmin-antiplasmin with incident cardiovascular disease and all-cause mortality.  
47  
48 *Am J Hematol* 2009;84:349-53.  
49  
50  
51 16. Folsom AR, Cushman M, Heckbert SR, et al. Factor VII coagulant activity, factor  
52  
53 VII -670A/C and -402G/A polymorphisms, and risk of venous thromboembolism. *J*  
54  
55 *Thromb Haemost* 2007;5:1674-8.  
56  
57  
58  
59  
60

- 1  
2  
3  
4 17. Rucker D, Tonelli M. Cardiovascular risk and management in chronic kidney  
5  
6 disease. *Nat Rev Nephrol* 2009;5:287-96.  
7  
8  
9 18. Gordge MP, Faint RW, Rylance PB, et al. Plasma D dimer: a useful marker of  
10  
11 fibrin breakdown in renal failure. *Thromb Haemost* 1989;61:522-5.  
12  
13  
14 19. Shibata T, Magari Y, Kamberi P, et al. Significance of urinary fibrin/fibrinogen  
15  
16 degradation products (FDP) D-dimer measured by a highly sensitive ELISA method  
17  
18 with a new monoclonal antibody (D-D E72) in various renal diseases. *Clin Nephrol*  
19  
20 1995;44:91-5.  
21  
22  
23  
24 20. Lane DA, Ireland H, Knight I, et al. The significance of fibrinogen derivatives in  
25  
26 plasma in human renal failure. *Br J Haematol* 1984;56:251-60.  
27  
28  
29 21. Kario K, Matsuo T, Matsuo M, et al. Marked increase of activated factor VII in  
30  
31 uremic patients. *Thromb Haemost* 1995;73:763-7.  
32  
33  
34 22. Levi M, Keller TT, van Gorp E, et al. Infection and inflammation and the  
35  
36 coagulation system. *Cardiovasc Res* 2003;60:26-39.  
37  
38  
39 23. Kaysen GA. The microinflammatory state in uremia: causes and potential  
40  
41 consequences. *J Am Soc Nephrol* 2001;12:1549-57.  
42  
43  
44 24. Karon BS. Why is everyone so excited about thromboelastography (TEG)? *Clin*  
45  
46 *Chim Acta* 2014;436:143-8.  
47  
48  
49 25. Holloway DS, Vagher JP, Caprini JA, et al. Thrombelastography of blood from  
50  
51 subjects with chronic renal failure. *Thromb Res* 1987;45:817-25.  
52  
53  
54 26. Pivalizza EG, Abramson DC, Harvey A. Perioperative hypercoagulability in  
55  
56 uremic patients: a viscoelastic study. *J Clin Anesth* 1997;9:442-5.  
57  
58  
59  
60

1  
2  
3  
4  
5  
6  
7  
8  
9  
10  
11  
12  
13  
14  
15  
16  
17  
18  
19  
20  
21  
22  
23  
24  
25  
26  
27  
28  
29  
30  
31  
32  
33  
34  
35  
36  
37  
38  
39  
40  
41  
42  
43  
44  
45  
46  
47  
48  
49  
50  
51  
52  
53  
54  
55  
56  
57  
58  
59  
60

For peer review only

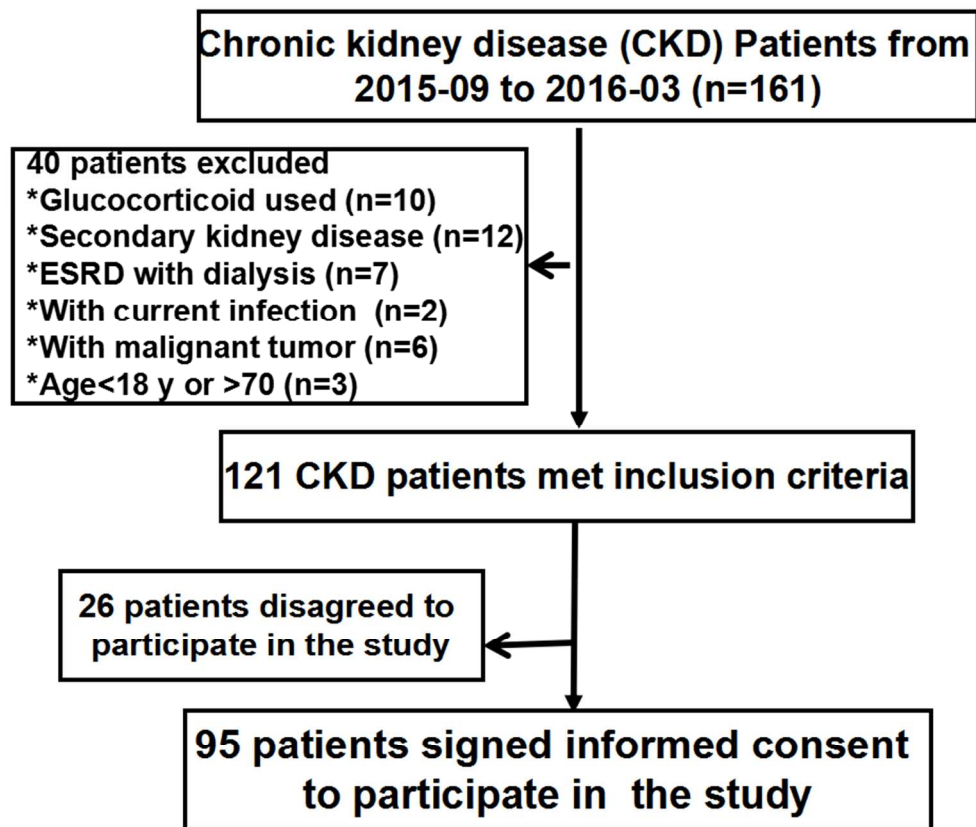

Figure 1. The flow chart of this study

200x170mm (120 x 120 DPI)



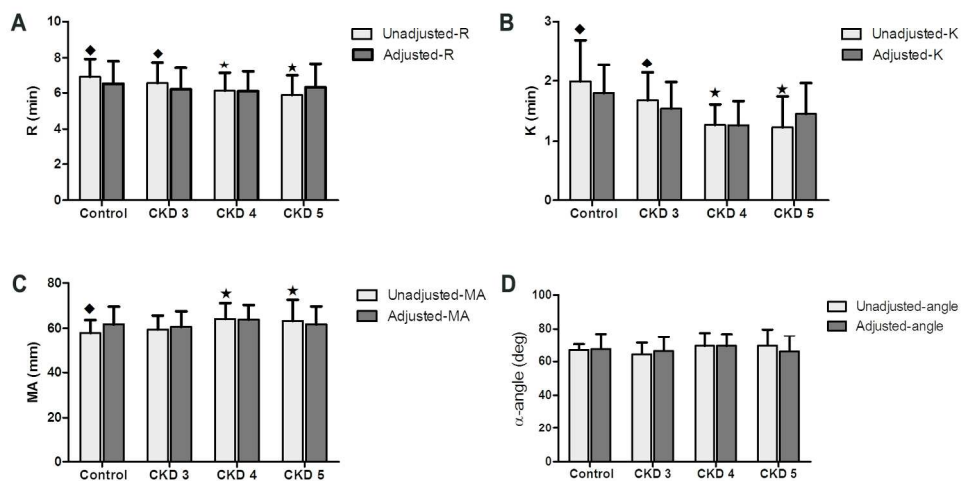

Figure 2. Unadjusted and adjusted TEG parameters in healthy controls, CKD3-5 stage. Data are adjusted for age, sex, history of diabetes, history of CHD, smoking status, MAP, BMI, hemoglobin, serum albumin, cholesterol, triglyceride, and UACR. (A) Unadjusted and Adjusted R value. (B) Unadjusted and Adjusted K value. (C) Unadjusted and Adjusted MA value. (D) Unadjusted and Adjusted  $\alpha$ -angle value. \* $p < 0.05$ , vs control group; ◆ $p < 0.05$ , vs CKD 5 group.

178x96mm (300 x 300 DPI)

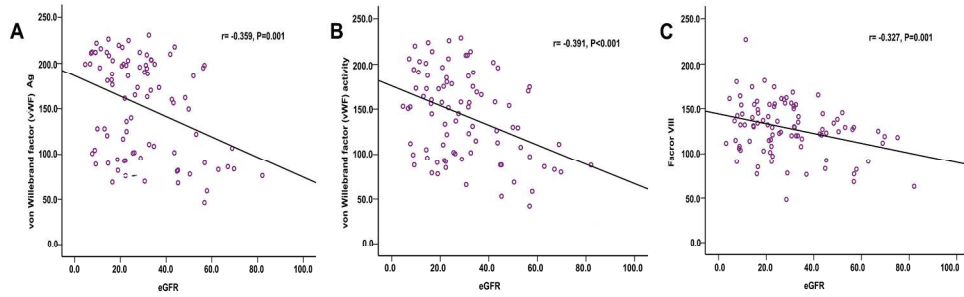

Figure 3. Correlation of vWF Ag, vWF:RCo, and FVIII levels with eGFR.  
(A) Correlation of vWF Ag with eGFR. (B) Correlation of vWF:RCo with eGFR. (C) Correlation of FVIII with eGFR.

230x80mm (300 x 300 DPI)

Peer review only

**STROBE 2007 (v4) checklist of items to be included in reports of observational studies in epidemiology\***  
**Checklist for cohort, case-control, and cross-sectional studies (combined)**

| Section/Topic             | Item # | Recommendation                                                                                                                                                                                                                                                                                                                                                                                                                                                         | Reported on page # |
|---------------------------|--------|------------------------------------------------------------------------------------------------------------------------------------------------------------------------------------------------------------------------------------------------------------------------------------------------------------------------------------------------------------------------------------------------------------------------------------------------------------------------|--------------------|
| Title and abstract        | 1      | (a) Indicate the study's design with a commonly used term in the title or the abstract                                                                                                                                                                                                                                                                                                                                                                                 | Page 2             |
|                           |        | (b) Provide in the abstract an informative and balanced summary of what was done and what was found                                                                                                                                                                                                                                                                                                                                                                    | Page 2             |
| <b>Introduction</b>       |        |                                                                                                                                                                                                                                                                                                                                                                                                                                                                        |                    |
| Background/rationale      | 2      | Explain the scientific background and rationale for the investigation being reported                                                                                                                                                                                                                                                                                                                                                                                   | Page 4             |
| Objectives                | 3      | State specific objectives, including any pre-specified hypotheses                                                                                                                                                                                                                                                                                                                                                                                                      | Page 4             |
| <b>Methods</b>            |        |                                                                                                                                                                                                                                                                                                                                                                                                                                                                        |                    |
| Study design              | 4      | Present key elements of study design early in the paper                                                                                                                                                                                                                                                                                                                                                                                                                | Page 5             |
| Setting                   | 5      | Describe the setting, locations, and relevant dates, including periods of recruitment, exposure, follow-up, and data collection                                                                                                                                                                                                                                                                                                                                        | Page 5-7           |
| Participants              | 6      | (a) <i>Cohort study</i> —Give the eligibility criteria, and the sources and methods of selection of participants. Describe methods of follow-up<br><i>Case-control study</i> —Give the eligibility criteria, and the sources and methods of case ascertainment and control selection. Give the rationale for the choice of cases and controls<br><i>Cross-sectional study</i> —Give the eligibility criteria, and the sources and methods of selection of participants | Page 5             |
|                           |        | (b) <i>Cohort study</i> —For matched studies, give matching criteria and number of exposed and unexposed<br><i>Case-control study</i> —For matched studies, give matching criteria and the number of controls per case                                                                                                                                                                                                                                                 |                    |
| Variables                 | 7      | Clearly define all outcomes, exposures, predictors, potential confounders, and effect modifiers. Give diagnostic criteria, if applicable                                                                                                                                                                                                                                                                                                                               | Page 5-7           |
| Data sources/ measurement | 8*     | For each variable of interest, give sources of data and details of methods of assessment (measurement). Describe comparability of assessment methods if there is more than one group                                                                                                                                                                                                                                                                                   | Page 5-7           |
| Bias                      | 9      | Describe any efforts to address potential sources of bias                                                                                                                                                                                                                                                                                                                                                                                                              | Page 8             |
| Study size                | 10     | Explain how the study size was arrived at                                                                                                                                                                                                                                                                                                                                                                                                                              |                    |
| Quantitative variables    | 11     | Explain how quantitative variables were handled in the analyses. If applicable, describe which groupings were chosen and why                                                                                                                                                                                                                                                                                                                                           |                    |
| Statistical methods       | 12     | (a) Describe all statistical methods, including those used to control for confounding                                                                                                                                                                                                                                                                                                                                                                                  | Page 8             |
|                           |        | (b) Describe any methods used to examine subgroups and interactions                                                                                                                                                                                                                                                                                                                                                                                                    | Page 8             |
|                           |        | (c) Explain how missing data were addressed                                                                                                                                                                                                                                                                                                                                                                                                                            |                    |
|                           |        | (d) <i>Cohort study</i> —If applicable, explain how loss to follow-up was addressed<br><i>Case-control study</i> —If applicable, explain how matching of cases and controls was addressed                                                                                                                                                                                                                                                                              | Page 8             |

|                          |     |                                                                                                                                                                                                                                                                                                                                                                                                               |                        |
|--------------------------|-----|---------------------------------------------------------------------------------------------------------------------------------------------------------------------------------------------------------------------------------------------------------------------------------------------------------------------------------------------------------------------------------------------------------------|------------------------|
|                          |     | <i>Cross-sectional study</i> —If applicable, describe analytical methods taking account of sampling strategy                                                                                                                                                                                                                                                                                                  |                        |
|                          |     | (e) Describe any sensitivity analyses                                                                                                                                                                                                                                                                                                                                                                         |                        |
| <b>Results</b>           |     |                                                                                                                                                                                                                                                                                                                                                                                                               |                        |
| Participants             | 13* | (a) Report numbers of individuals at each stage of study—eg numbers potentially eligible, examined for eligibility, confirmed eligible, included in the study, completing follow-up, and analysed<br>(b) Give reasons for non-participation at each stage<br>(c) Consider use of a flow diagram                                                                                                               | Page 8,9<br><br>Page 6 |
| Descriptive data         | 14* | (a) Give characteristics of study participants (eg demographic, clinical, social) and information on exposures and potential confounders<br>(b) Indicate number of participants with missing data for each variable of interest<br>(c) <i>Cohort study</i> —Summarise follow-up time (eg, average and total amount)                                                                                           | Page 8,9               |
| Outcome data             | 15* | <i>Cohort study</i> —Report numbers of outcome events or summary measures over time<br><i>Case-control study</i> —Report numbers in each exposure category, or summary measures of exposure<br><i>Cross-sectional study</i> —Report numbers of outcome events or summary measures                                                                                                                             |                        |
| Main results             | 16  | (a) Give unadjusted estimates and, if applicable, confounder-adjusted estimates and their precision (eg, 95% confidence interval). Make clear which confounders were adjusted for and why they were included<br>(b) Report category boundaries when continuous variables were categorized<br>(c) If relevant, consider translating estimates of relative risk into absolute risk for a meaningful time period | Page 11-15             |
| Other analyses           | 17  | Report other analyses done—eg analyses of subgroups and interactions, and sensitivity analyses                                                                                                                                                                                                                                                                                                                |                        |
| <b>Discussion</b>        |     |                                                                                                                                                                                                                                                                                                                                                                                                               |                        |
| Key results              | 18  | Summarise key results with reference to study objectives                                                                                                                                                                                                                                                                                                                                                      | Page 16                |
| Limitations              | 19  | Discuss limitations of the study, taking into account sources of potential bias or imprecision. Discuss both direction and magnitude of any potential bias                                                                                                                                                                                                                                                    | Page 18                |
| Interpretation           | 20  | Give a cautious overall interpretation of results considering objectives, limitations, multiplicity of analyses, results from similar studies, and other relevant evidence                                                                                                                                                                                                                                    | Page 16-18             |
| Generalisability         | 21  | Discuss the generalisability (external validity) of the study results                                                                                                                                                                                                                                                                                                                                         |                        |
| <b>Other information</b> |     |                                                                                                                                                                                                                                                                                                                                                                                                               |                        |
| Funding                  | 22  | Give the source of funding and the role of the funders for the present study and, if applicable, for the original study on which the present article is based                                                                                                                                                                                                                                                 | Page 19                |

\*Give information separately for cases and controls in case-control studies and, if applicable, for exposed and unexposed groups in cohort and cross-sectional studies.

**Note:** An Explanation and Elaboration article discusses each checklist item and gives methodological background and published examples of transparent reporting. The STROBE checklist is best used in conjunction with this article (freely available on the Web sites of PLoS Medicine at <http://www.plosmedicine.org/>, Annals of Internal Medicine at <http://www.annals.org/>, and Epidemiology at <http://www.epidem.com/>). Information on the STROBE Initiative is available at [www.strobe-statement.org](http://www.strobe-statement.org).

# BMJ Open

## Blood coagulation system in patients with chronic kidney disease: a prospective observational study

|                                 |                                                                                                                                                                                                                      |
|---------------------------------|----------------------------------------------------------------------------------------------------------------------------------------------------------------------------------------------------------------------|
| Journal:                        | <i>BMJ Open</i>                                                                                                                                                                                                      |
| Manuscript ID                   | bmjopen-2016-014294.R1                                                                                                                                                                                               |
| Article Type:                   | Research                                                                                                                                                                                                             |
| Date Submitted by the Author:   | 21-Feb-2017                                                                                                                                                                                                          |
| Complete List of Authors:       | Huang, Meng-Jie<br>Wei, Ri-bao<br>Wang, Yang<br>Su, Ting-yu<br>Di, Ping; Department of Clinical Laboratory, Chinese PLA General Hospital, Beijing, China<br>Li, Qing-ping<br>Yang, Xi<br>Li, Ping<br>Chen, Xiang-mei |
| <b>Primary Subject Heading</b>: | Urology                                                                                                                                                                                                              |
| Secondary Subject Heading:      | Renal medicine, Cardiovascular medicine                                                                                                                                                                              |
| Keywords:                       | Chronic kidney disease, Coagulation, Thrombotic events, Hypercoagulable state                                                                                                                                        |
|                                 |                                                                                                                                                                                                                      |

SCHOLARONE™  
Manuscripts

Only

1  
2  
3  
4 **Blood coagulation system in patients with chronic kidney disease: a prospective**  
5  
6 **observational study**  
7

8 Meng-Jie Huang<sup>a</sup>, Ri-bao Wei<sup>a\*</sup>, Yang Wang<sup>a</sup>, Ting-yu Su<sup>a</sup>, Ping Di<sup>b</sup>, Qing-ping Li<sup>a</sup>,  
9  
10 Xi Yang<sup>a</sup>, Ping Li<sup>a</sup>, Xiang-mei Chen<sup>a</sup>  
11  
12

13 <sup>a</sup>Department of Nephrology, Chinese PLA General Hospital, Chinese PLA Institute of  
14 Nephrology, State Key Laboratory of Kidney Diseases, National Clinical Research  
15 Center for Kidney Diseases, Beijing, China  
16  
17  
18  
19

20  
21 <sup>b</sup>Department of Clinical Laboratory, Chinese PLA General Hospital, Beijing, China  
22

23  
24 \*Corresponding author: Ri-bao Wei, MD, Department of Nephrology, Chinese PLA  
25 General Hospital, Chinese PLA Institute of Nephrology, State Key Laboratory of  
26 Kidney Diseases, National Clinical Research Center for Kidney Diseases, Beijing  
27  
28  
29  
30  
31 100853, People's Republic of China  
32

33  
34 Email: wrbbj2006@126.com    Tel: 86-10-55499133    Fax: 86-10-88626068  
35

36 **Number of Words:** 3130  
37  
38  
39  
40  
41  
42  
43  
44  
45  
46  
47  
48  
49  
50  
51  
52  
53  
54  
55  
56  
57  
58  
59  
60

## Abstract

Objectives: Thromboembolic events are the major factor affecting the prognosis of chronic kidney disease (CKD) patients. Hemostatic alterations are possible causes of these complications, but their roles remain poorly characterized. In the prospective observational study, we investigated the entire coagulation process in CKD patients to elucidate the mechanisms of their high thromboembolic risk.

Methods: A total of 95 CKD patients and 20 healthy controls who met the inclusion criteria were consecutively recruited from September 2015 to March 2016. The platelet count, platelet aggregation, von Willebrand factor antigen (vWF:Ag), vWF ristocetin cofactor activity (vWF:RCo), fibrinogen, factor V (FV), FVII, FVIII, antithrombin III, protein C, protein S, D-dimer, standard coagulation tests, and thromboelastography were measured in the CKD patients and controls. Associations between the estimated glomerular filtration rate (eGFR) and hemostatic biomarkers were tested using multivariable linear regression.

Results: The adjusted and unadjusted levels of vWF:Ag, vWF:RCo, fibrinogen, FVII, FVIII, and D-dimer were significantly higher in the CKD patients than that in the healthy controls, and were elevated with CKD progression. However, after adjustment for baseline differences, platelet aggregation and thromboelastography parameters showed no significant differences between the CKD patients and healthy controls. In the correlation analysis, vWF Ag, vWF:RCo, and FVIII were inversely associated with eGFR ( $r = -0.359$ ,  $P < 0.001$ ;  $r = -0.391$ ,  $P < 0.001$ ;  $r = -0.327$ ,  $P < 0.001$ , respectively). During the one year of follow up, one cardiovascular event

1  
2  
3  
4 occurred in patients with CKD 5 stage, whereas none thromboembolic event occurred  
5  
6 in the CKD 3-4 and control groups.  
7

8  
9 Conclusions: CKD patients are characterized by endothelial dysfunction and  
10  
11 increased coagulation, especially FVIII activity. The abnormal hemostatic profiles  
12  
13 may contribute to the elevated risk of thrombotic events but further longer-term study  
14  
15 with large samples are still required to more precisely determine the relationship  
16  
17 between the elevation of procoagulant factors and clinical outcomes.  
18  
19

### 20 21 **Strengths and limitations of this study** 22

- 23  
24 ● Existing studies on the mechanism of coagulation in CKD are mostly limited to  
25  
26 patients with end-stage renal disease requiring hemodialysis. The changes in the  
27  
28 coagulation function of non-dialysis patients with moderate to severe CKD have  
29  
30 not been completely clarified. In our research article, we investigated the entire  
31  
32 coagulation process in non-dialysis CKD patients.  
33  
34
- 35  
36 ● We found that CKD patients are characterized by endothelial dysfunction and  
37  
38 increased coagulation, especially FVIII activity. Besides, we also performed  
39  
40 thromboelastography for dynamic observation of the entire coagulation process in  
41  
42 CKD patients but detected no changes in the coagulation function.  
43  
44
- 45  
46 ● Due to the limited sample size and short term of follow-up, we might  
47  
48 underestimate the risk of thromboembolic events in CKD patients, which were  
49  
50 not well linked the observations with clinical outcomes.  
51  
52  
53  
54  
55  
56  
57  
58  
59  
60



## *Introduction*

Chronic kidney disease (CKD) patients commonly have blood coagulation disorders. The resulting thrombotic complications have become the most common cause of death and one of the difficulties in renal replacement therapy among CKD patients.<sup>1-4</sup> Existing studies on the mechanism of coagulation in CKD are mostly limited to hemodialysis patients with end-stage renal disease (ESRD).<sup>5-7</sup> The changes in the coagulation function of non-dialysis patients with moderate to severe CKD have not been completely clarified.

The coagulation process involves the participation of the platelets, vascular endothelium, coagulation system, anticoagulant system, and fibrinolytic system. Most coagulation test methods reflect changes in a particular blood coagulation step but have difficulty completely verifying the entire coagulation process in CKD patients. In the present study, several coagulation test methods were used to measure markers of platelet [platelet counts, platelet aggregability], endothelial function [von Willebrand factor antigen (vWF:Ag) and vWF ristocetin cofactor activity (vWF:RCo)], the major blood coagulation pathways [fibrinogen, factor V (FV), FVII, and FVIII], and natural coagulation inhibitors (antithrombin III, protein S and protein C). Additionally, standard coagulation tests and thromboelastography (TEG) were adopted for dynamic observation of the entire coagulation process. The purpose of the study was to investigate the entire coagulation process in non-dialysis patients at different CKD stages to elucidate the mechanisms of their high thromboembolic risk and guide antithrombotic treatment.

## *Methods*

### *1. Study design and subjects*

This prospective observational study was performed at the Department of Nephrology, Chinese PLA General Hospital. Between September 2015 and March 2016, consecutive patients 18 to 70 years of age with stages 3–5 non-dialysis-dependent CKD were included in this study. The exclusion criteria were as follows: (1) patients with secondary renal disease [diabetic nephropathy, lupus nephritis, or antineutrophil cytoplasmic autoantibody (ANCA)-associated vasculitis]; (2) patients with nephrotic syndrome; (3) patients with signs of acute infection, liver failure, trauma, surgery, cancer, or pregnancy; (4) patients on glucocorticoids, immunosuppressive medication and anticoagulant medication within the past 1 month; and (5) patients with a history of previous thromboembolic or hemorrhagic events within 12 months. Finally, 95 patients with CKD met the exclusion criteria and agreed to participate in the study. Additionally, 20 age- and gender-matched healthy controls with no history of kidney disease who met the same exclusion criteria were recruited. Informed consent was obtained from all individuals included in this study and the research was approved by the ethics committee of the General Hospital of the Chinese People's Liberation Army. A flowchart is shown in Figure 1.

### **Figure 1. The flow chart of this study**

### *2. General data collection*

We recorded the subjects' general conditions (age, gender, height, weight, systolic blood pressure, diastolic blood pressure, and smoking history), underlying diseases

1  
2  
3  
4 [coronary heart disease (CHD) and diabetes mellitus], and laboratory parameters  
5  
6 [hemoglobin, white blood cell count, platelet count, serum albumin, serum creatinine,  
7  
8 cholesterol, triglycerides, and urinary albumin to creatinine ratio (UACR)].  
9

10  
11 We also calculated the body mass index (BMI) and mean arterial pressure (MAP)  
12  
13 as follows:  $BMI = \text{weight (kg)}/[\text{height (m)}]^2$  and  $MAP = (\text{systolic blood pressure} +$   
14  
15  $2 \cdot \text{diastolic blood pressure})/3$ .  
16  
17

18  
19 The Chronic Kidney Disease Epidemiology Collaboration (CKD-EPI) equation  
20  
21 was used to estimate the glomerular filtration rate (eGFR).<sup>8</sup> The CKD stage was  
22  
23 defined according to the Kidney Disease Outcomes Quality Initiative (KDOQI)  
24  
25 guidelines.<sup>9</sup>  
26  
27

### 28 29 **3. Procoagulant and anticoagulant factors**

30  
31 Fasting cubital venous blood specimens were collected in the morning and mixed  
32  
33 with 109 mmol/L sodium citrate for anticoagulation (sodium citrate: blood = 1:9). The  
34  
35 blood samples were centrifuged at 3000rpm for 10 min within 1 h of collection to  
36  
37 obtain platelet-poor plasma. Factor V, VII, and VIII activities as well as the  
38  
39 anticoagulant factors protein C and protein S were analyzed by clotting assays.  
40  
41 vWF:Ag and vWF:RCo were measured by immunoturbidimetric assay. All  
42  
43 instruments (ACL TOP700) and reagents were purchased from USA Instrumentation  
44  
45 Laboratory Company.  
46  
47  
48

### 49 50 **4. Platelet aggregation tests**

51  
52 Platelet aggregation was measured by light transmittance aggregometry (LTA).  
53  
54 Citrate-anticoagulated whole blood was centrifuged at 800rpm for 5 minutes to obtain  
55  
56  
57  
58  
59  
60

1  
2  
3  
4 platelet-rich plasma. Platelet-poor plasma was obtained from the remaining specimen  
5  
6 by further centrifugation at 3000rpm for 10 minutes. Platelet-rich plasma was adjusted  
7  
8 to reach a platelet count of  $250 \times 10^9/L$ . Platelet aggregability was assessed at 37°C  
9  
10 with an AggRam aggregometer (Helena Laboratories, Corp., Beaumont, TX, USA).  
11  
12 Platelets were stimulated by 10  $\mu\text{mol/L}$  adenosine diphosphate (ADP). Aggregation  
13  
14 was expressed as the maximum percent change in light transmittance from baseline,  
15  
16 with platelet-poor plasma as a reference.  
17  
18  
19

### 20 21 **5. Standard coagulation tests**

22  
23 The activated partial thromboplastin time (APTT), prothrombin time (PT), and  
24  
25 fibrinogen were analyzed by the magnetic bead assay. Antithrombin III was analyzed  
26  
27 by the chromogenic substrate assay. The D-dimer content was measured by  
28  
29 immunoturbidimetry using a device and reagents purchased from Stago (France).  
30  
31  
32

### 33 34 **6. Thromboelastography (TEG)**

35  
36 The coagulation status was assessed via TEG using citrated whole blood samples.  
37  
38 For each TEG assay, citrated whole blood (1 ml) was pipetted into a vial containing  
39  
40 1% kaolin and inverted 5 times to ensure mixing of kaolin with the blood. Then, 340  
41  
42  $\mu\text{l}$  of kaolin-activated citrated whole blood was transferred to a TEG cup to which 20  
43  
44  $\mu\text{l}$  of 0.2 mol/l  $\text{CaCl}_2$  had been preloaded for recalcification. The TEG analyzer was  
45  
46 stopped 40-60 minutes after reaching the maximum amplitude at 37°C. The  
47  
48 parameters included (1) reaction time (R) - time from the start of the test to a TEG  
49  
50 amplitude of 2 mm, reflecting the combined effect of the coagulation factors involved  
51  
52 in the initiation of hemostasis; (2) K-time (K) - the period from the TEG amplitude of  
53  
54  
55  
56  
57  
58  
59  
60

1  
2  
3  
4 2 mm to when the curve reached an amplitude of 20 mm, which measured the rate of  
5  
6 clot formation (fibrin cross-linking); (3)  $\alpha$ -angle - the angle between the tangent line  
7  
8 (drawn from the split point to the curve) and the horizontal base line, representing the  
9  
10 acceleration of fibrin build-up and cross-linking; and (4) maximum amplitude (MA) -  
11  
12 indicative of the strength of the clot that reflected the cross interaction between  
13  
14 platelet functions and coagulation.  
15  
16

### 17 18 19 **7. Thromboembolic events**

20  
21 The incidence of thromboembolic events in the CKD patients and healthy  
22  
23 controls were recorded during the one-year of follow-up. Evidence suggests that  
24  
25 patients with suspected thromboembolic events should be managed with a diagnostic  
26  
27 strategy that includes clinical pre-test probability in the form of prediction scores,  
28  
29 D-dimer test, and appropriate clinical imaging results.<sup>10</sup>  
30  
31  
32

### 33 34 **6. Statistical analysis**

35  
36 Data analysis was performed using SPSS software, version 19.0 (Chicago, IL,  
37  
38 USA). The results are expressed as the mean  $\pm$  standard deviation or the median  
39  
40 (range) for continuous data and as a frequency or percentage for categorical data. We  
41  
42 initially compared baseline characteristics among the CKD patients and healthy  
43  
44 controls using analysis of variance (ANOVA), Kruskal-Wallis test or Chi-squared test  
45  
46 as appropriate. A generalized linear model estimating procedure was used to obtain  
47  
48 adjusted mean levels of procoagulant biomarkers within renal function categories.  
49  
50 Using multivariable linear regression, we examined the association of eGFR with  
51  
52 hemostatic biomarkers. eGFR and other baseline characteristics were the independent  
53  
54  
55  
56  
57  
58  
59  
60

variables and the biomarkers were the dependent variables in these analyses. P values less than 0.05 were considered statistically significant.

## Results

### Participants' characteristics

Baseline characteristics of the CKD patients and healthy controls are shown in Table 1. No significant differences were detected in age, gender ratio, BMI, white blood cell, or cholesterol between the CKD patients and healthy controls. Subjects with CKD stage 5 (CKD 5) had higher MAP, triglyceride, and UACR but lower hemoglobin and serum albumin levels than the healthy controls. Given the small number of subjects with concomitant CHD, diabetes mellitus, and smoking in the CKD and healthy control groups, we combined CKD stage 3–5 patients for comparison with the healthy controls. However, no significant differences were found between the CKD patients and healthy controls regarding CHD, diabetes mellitus, or smoking ratio.

**Table 1. Characteristics of chronic kidney disease patients and healthy controls**

| Variables                 | Healthy control       | CKD3                  | CKD4                  | CKD5        | P      |
|---------------------------|-----------------------|-----------------------|-----------------------|-------------|--------|
| No. of patients           | 20                    | 32                    | 38                    | 25          |        |
| Gender, M, n (%)          | 9(47%)                | 22(69%)               | 25(66%)               | 13(52%)     | 0.225  |
| Age (year)                | 39.7±16.7             | 40.3±11.3             | 44.5±14.4             | 44.0±13.7   | 0.443  |
| BMI (kg/ m <sup>2</sup> ) | 23.3±4.3              | 24.4±4.2              | 24.7±3.6              | 23.8±4.2    | 0.582  |
| MAP (mmHg)                | 89.5±9.3 <sup>♦</sup> | 95.0±9.4 <sup>♦</sup> | 97.5±8.5 <sup>♦</sup> | 103.8±17.2* | <0.001 |

|                                       |                         |                           |                           |              |        |
|---------------------------------------|-------------------------|---------------------------|---------------------------|--------------|--------|
| Hemoglobin (g/L)                      | 136.3±17.4 <sup>♦</sup> | 131.2±20.2 <sup>♦</sup>   | 118.9±18.1 <sup>*♦</sup>  | 98.5±14.2*   | <0.001 |
| White blood cell (10 <sup>9</sup> /l) | 6.1±1.6                 | 7.1±2.1                   | 7.1±1.5                   | 6.9±2.2      | 0.398  |
| Serum albumin (g/L)                   | 43.2±2.9 <sup>♦</sup>   | 41.1±3.4                  | 40.7±3.4                  | 39.1±3.6*    | 0.004  |
| Serum creatinine (umol/l)             | 69.4±13.5 <sup>♦</sup>  | 155.5±31.5 <sup>*♦</sup>  | 265.7±63.4 <sup>*♦</sup>  | 542.1±237.1* | <0.001 |
| eGFR (ml/min/1.73 m <sup>2</sup> )    | 101.4±21.9 <sup>♦</sup> | 48.9±13.9 <sup>*♦</sup>   | 24.7±6.3 <sup>*♦</sup>    | 10.9±4.1*    | <0.001 |
| Cholesterol (mmol/l)                  | 4.2±0.9                 | 4.2±1.2                   | 4.2±0.8                   | 4.0±0.9      | 0.959  |
| Triglyceride (mmol/l)                 | 1.2±0.6                 | 1.9±0.9*                  | 2.3±1.1 <sup>♦</sup>      | 1.7±0.8      | 0.003  |
| UACR (mg/g)                           | 7.3±2.7 <sup>♦</sup>    | 201.9±142.7 <sup>*♦</sup> | 313.8±139.5 <sup>*♦</sup> | 472.2±224.1* | <0.001 |
| CHD, n (%)                            | 2 (10%)                 | 1 (3%)                    | 3 (8%)                    | 1 (4%)       | 0.753  |
| Diabetes Mellitus, n (%)              | 1(5%)                   | 2 (6%)                    | 3 (8%)                    | 3 (11%)      | 0.523  |
| Current smoking,n (%)                 | 2(10%)                  | 7 (21%)                   | 6 (15%)                   | 1 (4%)       | 0.457  |

Data are expressed as mean±standard deviation (SD) or median (interquartile range) as appropriate; BMI=body mass index; MAP=mean arterial pressure; eGFR=estimated glomerular filtration rate; UACR=Urine Albumin/Creatinine ratio; CHD=coronary artery disease.

\*p<0.05, vs control group;

♦p<0.05, vs CKD 5 group

#### ***Procoagulant biomarkers according to chronic kidney disease***

Table 2 shows the procoagulant biomarkers by CKD status. Levels of FVII, FVIII, vWF:Ag, vWF:RCo, fibrinogen, and D-dimer were significantly higher in the CKD patients than the levels in the controls before and after adjustment for age, gender, history of diabetes, history of CHD, smoking status, MAP, BMI, hemoglobin, serum

albumin, cholesterol, triglyceride, and UACR (adjusted values shown in Supplementary Table S1). The magnitude of elevation of the given parameters was proportional to severity of CKD. Prior to adjustment, platelet aggregability was significantly higher and protein C was lower in the CKD 5 patients than that in the controls; however, no significant differences were found after adjustment ( $P=0.736$ ;  $P=0.267$  respectively). Irrespective of the adjustment, platelet count, FV, antithrombin III, APTT, and PT showed no significant differences among the CKD 3–5 patients and the healthy controls.

In order to make our research more accurate, we further excluded smokers as well as patients with diabetes mellitus and uncontrolled hypertension, and then compared the hemostatic profiles among these patients by CKD status. The results showed that the positive associations of renal insufficiency with these procoagulant biomarkers were similar in participants with or without the above-mentioned comorbidities (Supplementary Table S2).

**Table 2. Procoagulant biomarkers by chronic kidney disease status.**

| Variables                               | Healthy control         | CKD3                     | CKD4        | CKD5        | P      | #P     |
|-----------------------------------------|-------------------------|--------------------------|-------------|-------------|--------|--------|
| Platelet ( $10^9/l$ )                   | 237.2±47.4              | 214.8±65.0               | 214.0±52.8  | 195.8±58.6  | 0.156  | 0.284  |
| ADP <sub>LTA</sub> (%) <sup>&amp;</sup> | 64.6±4.8 <sup>♦</sup>   | 67.3±8.6 <sup>♦</sup>    | 70.1±8.6    | 74.7±8.2*   | 0.041  | 0.738  |
| Factor V (%)                            | 113.6±26.1              | 98.4±31.9                | 106.7±36.9  | 103.4±33.3  | 0.533  | 0.640  |
| Factor VII(%)                           | 74.2±14.3 <sup>♦</sup>  | 94.5±18.0* <sup>♦</sup>  | 104.2±17.9* | 108.4±27.2* | <0.001 | 0.050  |
| Factor VIII(%)                          | 86.5±22.3 <sup>♦</sup>  | 115.3±25.1* <sup>♦</sup> | 130.5±27.6* | 139.9±33.0* | <0.001 | <0.001 |
| VWF:Ag(%)                               | 103.1±42.4 <sup>♦</sup> | 124.7±51.4 <sup>♦</sup>  | 158.9±49.9* | 181.8±45.6* | <0.001 | 0.011  |



|                 |                         |                         |                      |             |        |       |
|-----------------|-------------------------|-------------------------|----------------------|-------------|--------|-------|
| vWF:RCo(%)      | 99.8±29.9 <sup>♦</sup>  | 115.5±43.2 <sup>♦</sup> | 150.2±45.1*          | 168.2±41.5* | <0.001 | 0.004 |
| Fibrinogen(g/l) | 3.0±0.8 <sup>♦</sup>    | 3.1±0.7 <sup>♦</sup>    | 3.8±0.8 <sup>♦</sup> | 4.5±1.1*    | <0.001 | 0.006 |
| Protein C(%)    | 105.3±17.0 <sup>♦</sup> | 99.4±18.6 <sup>♦</sup>  | 93.5±17.9            | 86.6±15.2*  | 0.024  | 0.736 |
| Protein S(%)    | 76.8±23.2               | 88.2±24.6               | 94.5±20.7            | 99.5±25.5   | 0.076  | 0.584 |
| AT III (%)      | 99.5±9.3                | 103.8±12.2              | 103.8±11.7           | 103.1±11.8  | 0.658  | 0.189 |
| D-dimer (ng/ml) | 257±116 <sup>♦</sup>    | 425±277 <sup>♦</sup>    | 505±320 <sup>♦</sup> | 842±496*    | <0.001 | 0.039 |
| APTT(s)         | 39.0±4.5                | 37.7±3.2                | 37.5±3.7             | 39.0±4.2    | 0.286  | 0.187 |
| PT(s)           | 13.4±0.6                | 13.5±0.6                | 13.5±0.6             | 13.7±0.6    | 0.320  | 0.192 |

<sup>#</sup>P-values for the adjusted model. Data are adjusted for age, sex, history of diabetes, history of CHD, smoking status, MAP, BMI, hemoglobin, serum albumin, cholesterol, triglyceride, and UACR.

ADP<sub>LTA</sub>(%)<sup>&</sup>: Platelet aggregation records were available in 49 CKD cases (15 cases in CKD 3 stage; 21 cases in CKD 4 stage; 13 cases in CKD 5 stage) and 9 healthy controls.

AT III=antithrombin III; APTT=activated partial thromboplastin time; LTA=Light transmittance aggregometry; PT= prothrombin time.

\*p<0.05, vs control group; <sup>♦</sup>p<0.05, vs CKD 5 group

### **Thromboelastography**

Figure 2 compares the TEG parameters between the CKD patients and the healthy controls. The results showed that the R time and K time in the unadjusted cohort were hypercoagulable in the CKD 4–5 patients compared with the CKD 3 patients and the healthy controls (p < 0.05). The MA values in the CKD 5 group were

1  
2  
3  
4 significantly higher than the values in the control group ( $63.3 \pm 9.3$  mm versus  
5  
6  $57.9 \pm 5.7$  mm,  $p=0.046$ ). However, after adjustment for relevant factors, no significant  
7  
8 differences were found in the R, K, MA, and  $\alpha$ -angle values between the CKD  
9  
10 patients and the healthy controls.  
11

12  
13  
14 **Figure 2. TEG parameters in healthy controls and chronic kidney disease**  
15  
16 **patients.**

17  
18 (A) R value. (B) K value. (C) MA value. (D)  $\alpha$ -angle value.

19  
20  
21 #P-values for the adjusted model. Data are adjusted for age, sex, history of diabetes,  
22  
23 history of CHD, smoking status, MAP, BMI, hemoglobin, serum albumin, cholesterol,  
24  
25 triglyceride, and UACR.  
26  
27

28  
29 \* $p < 0.05$ , vs control group for unadjusted values;  $\blacklozenge p < 0.05$ , vs CKD 5 group for  
30  
31 unadjusted values.  
32

33  
34 ***Associations between renal function and hemostatic biomarkers***

35  
36 As shown in Figure 3, vWF Ag, vWF:RCo, FVIII were inversely correlated with  
37  
38 eGFR ( $r = -0.359$ ,  $P=0.001$ ;  $r = -0.391$ ,  $P < 0.001$ ;  $r = -0.327$ ,  $P=0.001$ ). Besides, we  
39  
40 also used multivariable linear regression to analyze the associations between eGFR  
41  
42 and hemostatic biomarkers. Adjustment for age, sex, history of diabetes, history of  
43  
44 CHD, smoking status, MAP, BMI, hemoglobin, serum albumin, eGFR, cholesterol,  
45  
46 triglyceride, and UACR, higher vWF Ag, vWF:RCo and FVIII were significantly  
47  
48 associated with a decreased eGFR [Regression Coefficients:  $-0.92(-1.33, -0.40)$ ;  $-0.82$   
49  
50  $(-1.19, -0.45)$ ;  $-0.50(-0.69, -0.31)$  respectively].  
51  
52  
53  
54  
55

56  
57 **Figure 3. Correlation of vWF Ag, vWF:RCo, and FVIII levels with eGFR.**  
58  
59  
60

1  
2  
3  
4 (A) Correlation of vWF Ag with eGFR. (B) Correlation of vWF:RCo with eGFR. (C)  
5  
6 Correlation of FVIII with eGFR. Regression lines: (A)  $vWF\ Ag=186.3-1.12\times eGFR$ .  
7  
8  
9 (B)  $vWF:RCo=174.2-1.05\times eGFR$ . (C)  $FVIII=143.2-0.52\times eGFR$ .

### 11 ***Thromboembolic events***

12  
13  
14 One cardiovascular event (acute myocardial syndrome) occurred in patients with  
15  
16 CKD 5 stage, whereas none thromboembolic event occurred in the CKD 3-4 and  
17  
18 control groups during the one-year of follow-up.  
19

### 21 ***Discussion***

22  
23  
24 We evaluated the coagulation profiles in CKD patients who were not receiving  
25  
26 dialysis using multiple laboratory methods, including the vascular endothelium,  
27  
28 coagulation factor, anticoagulation system, conventional blood test, standard  
29  
30 coagulation tests, and TEG.  
31  
32

33  
34 VWF, which is a large molecular weight glycoprotein synthesized and secreted by  
35  
36 endothelial cells and megakaryocytes, exerts a procoagulant effect through platelet  
37  
38 adhesion and aggregation and FVIII stabilization.<sup>11</sup> The increased vWF is a sign of  
39  
40 endothelial injury and a risk for thromboembolic events.<sup>12, 13</sup> Fibrinogen, FVII, and  
41  
42 FVIII are important coagulation factors in the coagulation pathway, whereas D-dimer  
43  
44 reflects the activation of the coagulation system and the formation of blood clots in  
45  
46 the body. Fibrinogen, FVII, FVIII, and D-dimer have also been shown to be  
47  
48 associated with an increased prevalence of thromboembolic events.<sup>14-17</sup>  
49  
50  
51  
52

53  
54 In our study, we observed elevated D-dimer, fibrinogen, factor VII, and especially  
55  
56 factor VIII and vWF levels in CKD patients. And the coagulation was increased with  
57  
58  
59  
60

1  
2  
3  
4 the aggravation of renal injury. CKD patients often present higher levels of traditional  
5  
6 risk factors for thromboembolic events, such as hypertension, diabetes, obesity and  
7  
8 dyslipidemia;<sup>18</sup> these factors also affect the coagulation system. In our attempt to  
9  
10 explain hemostatic alterations in chronic kidney disease, we adjusted for the above  
11  
12 influencing factors. The results showed that procoagulant factors were still  
13  
14 significantly elevated in the CKD patients, indicating that kidney dysfunction affected  
15  
16 the activation of coagulation function in addition to traditional risk factors.  
17  
18  
19

20  
21 Possible mechanisms to explain the association of lower eGFR and higher levels  
22  
23 of hemostatic factors are as follows. (1) With CKD progression, renal impairment is  
24  
25 aggravated and a large number of renal units are damaged, resulting in the loss of  
26  
27 normal excretory function and a reduction in the removal of procoagulant substances.  
28  
29 A few studies found that the metabolism and elimination of fibrinogen and D-dimer  
30  
31 were decreased in CKD and ESRD.<sup>19-21</sup> (2) The increase in the FVII level may be due  
32  
33 to vascular endothelial damage in CKD patients, resulting in tissue factor  
34  
35 expression.<sup>22</sup> (3) Moreover, extensive research has found that vWF, fibrinogen, and  
36  
37 FVIII are associated with the inflammatory response.<sup>23</sup> CKD patients are commonly  
38  
39 associated with changes in the levels of various inflammatory cytokines.<sup>24</sup>  
40  
41 Proinflammatory substances can activate procoagulant factors and result in elevated  
42  
43 levels of particular hemostatic factors.  
44  
45  
46  
47  
48  
49

50  
51 TEG displays blood clot formation dynamics from initial thrombin generation to  
52  
53 fibrinolysis.<sup>25</sup> In the current study, we also performed TEG for dynamic observation  
54  
55 of the entire coagulation process in CKD patients. Prior to adjustment for  
56  
57  
58  
59  
60

1  
2  
3  
4 confounding factors, the TEG data suggested that all aspects of coagulation were  
5  
6 increased in the CKD patients, including initial fibrin formation, fibrin-platelet  
7  
8 interactions, and qualitative platelet functions. However, after adjustment for relevant  
9  
10 influencing factors, we found no significant differences in the TEG parameters (R, K,  
11  
12 MA, and angle) between the CKD patients and the healthy controls, which is in  
13  
14 contrast to previous TEG studies in hemodialysis patients with ESRD.<sup>26, 27</sup>  
15  
16 Hemodialysis patients are influenced by hemodynamic factors and coagulant use and  
17  
18 thus present more complicated changes in coagulation functions, which are different  
19  
20 from those in non-dialysis CKD patients.<sup>5</sup> Thus, whether TEG can be used to  
21  
22 effectively evaluate the integrated coagulation function in non-dialysis CKD patients  
23  
24 requires further validation.  
25  
26  
27  
28  
29

30  
31 In this study, the cardiovascular event occurred in one patient with CKD 5 stage  
32  
33 during the one-year of follow-up. This clinical outcome may not be consistent with  
34  
35 previous HOPE study which includes 980 subjects and shows 22.2% cumulative  
36  
37 incidence of cardiovascular events<sup>28</sup>. However, it should be noted that patients in  
38  
39 HOPE study are older (at least 55 years of age) and have higher cardiovascular risk  
40  
41 compared with our participants. Besides, the follow-up time (3.5 to 5.5 years) is much  
42  
43 longer than that of our current study. The small sample size and short term follow-up  
44  
45 in our study might underestimate the risk of thromboembolic events and make it  
46  
47 difficult to link the observations with clinical outcomes. Further longer-term study  
48  
49 with large samples are still required to more precisely determine the relationship  
50  
51 between the elevation of procoagulant factors and clinical outcomes.  
52  
53  
54  
55  
56  
57  
58  
59  
60

1  
2  
3  
4 The present study has certain limitations. One limitation of this study is the  
5  
6 limited number of individuals in the different patient groups and the short term of  
7  
8 follow-up. We could not fully evaluate the thromboembolic events. Thus, it limited  
9  
10 the applicability of the conclusion of this study. Second, the CKD groups were  
11  
12 heterogeneous with a number of factors and complications interfering with the  
13  
14 delicate system of hemostasis, even though we had adjusted the related factors and  
15  
16 also assessed the hemostatic profiles in small number of participants without the  
17  
18 comorbidities.  
19  
20  
21  
22

### 23 **Conclusions**

24  
25  
26 In conclusion, CKD patients are characterized by endothelial dysfunction and  
27  
28 increased coagulation, especially FVIII activity. The abnormal hemostatic profiles  
29  
30 may contribute to the elevated risk of thrombotic events and further longer-term study  
31  
32 with large samples are still required to more precisely determine the relationship  
33  
34 between the elevation of procoagulant factors and clinical outcomes. TEG detected no  
35  
36 changes in the coagulation function among the CKD patients. Whether TEG can  
37  
38 effectively evaluate the integrated coagulation function in CKD patients needs to be  
39  
40 verified using larger samples. Future studies are required to target the role of  
41  
42 coagulation management for CKD patients to reduce co-morbidities.  
43  
44  
45  
46  
47

48  
49 **Contributors:** H-MJ. W-RB and C-XM created and designed this study. H-MJ. W Y.  
50  
51 S-TY. L-QP and Y X collected and analyzed the data. H-MJ. W-RB. D P and L P  
52  
53 contributed to the preparation and edition of the manuscript.  
54  
55  
56  
57  
58  
59  
60

1  
2  
3  
4 **Funding:** This work was supported in by the National Sciences Foundation of China  
5  
6 [grant numbers 81273968, 81471027 and 81401160]; Ministerial projects of the  
7  
8 National Working Commission on Aging [grant number QLB2014W002]; and The  
9  
10 Four hundred project of 301[grant number YS201408].  
11  
12

13  
14 **Competing interests:** We declare that the authors do not have any potential conflicts  
15  
16 of interest.  
17

18  
19 **Data sharing:** No additional data

## 20 21 Reference

- 22  
23  
24 1. Liang CC, Wang SM, Kuo HL, et al. Upper gastrointestinal bleeding in patients  
25  
26 with CKD. *Clin J Am Soc Nephrol* 2014; 9: 1354-9.  
27  
28  
29 2. Wattanakit K, Cushman M, Stehman-Breen C, et al. Chronic kidney disease  
30  
31 increases risk for venous thromboembolism. *J Am Soc Nephrol* 2008; 19: 135-40.  
32  
33  
34 3. Bos MJ, Koudstaal PJ, Hofman A, et al. Decreased glomerular filtration rate is a  
35  
36 risk factor for hemorrhagic but not for ischemic stroke: the Rotterdam Study. *Stroke*  
37  
38 2007; 38: 3127-32.  
39  
40  
41 4. Foley RN, Parfrey PS, Sarnak MJ. Clinical epidemiology of cardiovascular  
42  
43 disease in chronic renal disease. *Am J Kidney Dis* 1998; 32: S112-9.  
44  
45  
46 5. Darlington A, Ferreiro JL, Ueno M, et al. Haemostatic profiles assessed by  
47  
48 thromboelastography in patients with end-stage renal disease. *Thromb Haemost* 2011;  
49  
50 106: 67-74.  
51  
52  
53  
54 6. Molino D, De Lucia D, Gaspare De Santo N. Coagulation disorders in uremia.  
55  
56 *Semin Nephrol* 2006; 26: 46-51.  
57  
58  
59  
60

- 1  
2  
3  
4 7. Vaziri ND, Gonzales EC, Wang J, et al. Blood coagulation, fibrinolytic, and  
5  
6 inhibitory proteins in end-stage renal disease: effect of hemodialysis. *Am J Kidney Dis*  
7  
8 1994; 23: 828-35.
- 9  
10  
11 8. Levey AS, Stevens LA, Schmid CH, et al. A new equation to estimate glomerular  
12  
13 filtration rate. *Ann Intern Med* 2009; 150: 604-12.
- 14  
15  
16 9. K/DOQI clinical practice guidelines for chronic kidney disease: evaluation,  
17  
18 classification, and stratification. *Am J Kidney Dis* 2002; 39: S1-266.
- 19  
20  
21 10. Hogg K, Wells PS, Gandara E. The diagnosis of venous thromboembolism. *Semin*  
22  
23 *Thromb Hemost* 2012; 38: 691-701.
- 24  
25  
26 11. Beguin S, Kumar R, Keularts I, et al. Fibrin-dependent platelet procoagulant  
27  
28 activity requires GPIb receptors and von Willebrand factor. *Blood* 1999; 93: 564-70.
- 29  
30  
31 12. Danesh J, Wheeler JG, Hirschfield GM, et al. C-reactive protein and other  
32  
33 circulating markers of inflammation in the prediction of coronary heart disease. *N*  
34  
35 *Engl J Med* 2004; 350: 1387-97.
- 36  
37  
38 13. Rumley A, Lowe GD, Sweetnam PM, et al. Factor VIII, von Willebrand factor  
39  
40 and the risk of major ischaemic heart disease in the Caerphilly Heart Study. *Br J*  
41  
42 *Haematol* 1999; 105: 110-6.
- 43  
44  
45 14. Kirmizis D, Tsiandoulas A, Pangalou M, et al. Validity of plasma fibrinogen,  
46  
47 D-dimer, and the von Willebrand factor as markers of cardiovascular morbidity in  
48  
49 patients on chronic hemodialysis. *Med Sci Monit* 2006; 12: Cr55-62.  
50  
51  
52  
53  
54  
55  
56  
57  
58  
59  
60



- 1  
2  
3  
4 15. Bash LD, Erlinger TP, Coresh J, et al. Inflammation, hemostasis, and the risk of  
5  
6 kidney function decline in the Atherosclerosis Risk in Communities (ARIC) Study.  
7  
8 *Am J Kidney Dis* 2009; 53: 596-605.  
9
- 10  
11 16. Folsom AR, Delaney JA, Lutsey PL, et al. Associations of factor VIIIc, D-dimer,  
12  
13 and plasmin-antiplasmin with incident cardiovascular disease and all-cause mortality.  
14  
15 *Am J Hematol* 2009; 84: 349-53.  
16  
17
- 18 17. Folsom AR, Cushman M, Heckbert SR, et al. Factor VII coagulant activity, factor  
19  
20 VII -670A/C and -402G/A polymorphisms, and risk of venous thromboembolism. *J*  
21  
22 *Thromb Haemost* 2007; 5: 1674-8.  
23  
24
- 25 18. Rucker D, Tonelli M. Cardiovascular risk and management in chronic kidney  
26  
27 disease. *Nat Rev Nephrol* 2009; 5: 287-96.  
28  
29
- 30 19. Gordge MP, Faint RW, Rylance PB, et al. Plasma D dimer: a useful marker of  
31  
32 fibrin breakdown in renal failure. *Thromb Haemost* 1989; 61: 522-5.  
33  
34
- 35 20. Shibata T, Magari Y, Kamberi P, et al. Significance of urinary fibrin/fibrinogen  
36  
37 degradation products (FDP) D-dimer measured by a highly sensitive ELISA method  
38  
39 with a new monoclonal antibody (D-D E72) in various renal diseases. *Clin Nephrol*  
40  
41 1995; 44: 91-5.  
42  
43
- 44 21. Lane DA, Ireland H, Knight I, et al. The significance of fibrinogen derivatives in  
45  
46 plasma in human renal failure. *Br J Haematol* 1984; 56: 251-60.  
47  
48
- 49 22. Kario K, Matsuo T, Matsuo M, et al. Marked increase of activated factor VII in  
50  
51 uremic patients. *Thromb Haemost* 1995; 73: 763-7.  
52  
53  
54  
55  
56  
57  
58  
59  
60

- 1  
2  
3  
4 23. Levi M, Keller TT, van Gorp E, et al. Infection and inflammation and the  
5  
6 coagulation system. *Cardiovasc Res* 2003; 60: 26-39.  
7  
8  
9 24. Kaysen GA. The microinflammatory state in uremia: causes and potential  
10  
11 consequences. *J Am Soc Nephrol* 2001; 12: 1549-57.  
12  
13  
14 25. Karon BS. Why is everyone so excited about thromboelastography (TEG)? *Clin*  
15  
16 *Chim Acta* 2014; 436: 143-8.  
17  
18  
19 26. Holloway DS, Vagher JP, Caprini JA, et al. Thrombelastography of blood from  
20  
21 subjects with chronic renal failure. *Thromb Res* 1987; 45: 817-25.  
22  
23  
24 27. Pivalizza EG, Abramson DC, Harvey A. Perioperative hypercoagulability in  
25  
26 uremic patients: a viscoelastic study. *J Clin Anesth* 1997; 9: 442-5.  
27  
28  
29 28. Mann JF, Gerstein HC, Pogue J, et al. Renal insufficiency as a predictor of  
30  
31 cardiovascular outcomes and the impact of ramipril: the HOPE randomized trial. *Ann*  
32  
33 *Intern Med* 2001; 134: 629-36.  
34  
35  
36  
37  
38

39 **Figure 1. The flow chart of this study**

40  
41 **Figure 2. TEG parameters in healthy controls and chronic kidney disease**  
42  
43 **patients.**

44  
45  
46 (A) R value. (B) K value. (C) MA value. (D)  $\alpha$ -angle value.

47  
48  
49 #P-values for the adjusted model. Data are adjusted for age, sex, history of diabetes,  
50  
51 history of CHD, smoking status, MAP, BMI, hemoglobin, serum albumin, cholesterol,  
52  
53 triglyceride, and UACR.  
54  
55  
56  
57  
58  
59  
60

1  
2  
3  
4 \*p<0.05, vs control group for unadjusted values; ♦p<0.05, vs CKD 5 group for  
5  
6 unadjusted values.  
7

8  
9 **Figure 3. Correlation of vWF Ag, vWF:RCo, and FVIII levels with eGFR.**

10  
11 (A) Correlation of vWF Ag with eGFR. (B) Correlation of vWF:RCo with eGFR. (C)

12  
13 Correlation of FVIII with eGFR. Regression lines: (A)  $vWF\ Ag=186.3-1.12 \times eGFR$ .

14  
15  
16 (B)  $vWF:RCo=174.2-1.05 \times eGFR$ . (C)  $FVIII=143.2-0.52 \times eGFR$ .  
17  
18  
19  
20  
21  
22  
23  
24  
25  
26  
27  
28  
29  
30  
31  
32  
33  
34  
35  
36  
37  
38  
39  
40  
41  
42  
43  
44  
45  
46  
47  
48  
49  
50  
51  
52  
53  
54  
55  
56  
57  
58  
59  
60

1  
2  
3  
4  
5  
6  
7  
8  
9  
10  
11  
12  
13  
14  
15  
16  
17  
18  
19  
20  
21  
22  
23  
24  
25  
26  
27  
28  
29  
30  
31  
32  
33  
34  
35  
36  
37  
38  
39  
40  
41  
42  
43  
44  
45  
46  
47  
48  
49  
50  
51  
52  
53  
54  
55  
56  
57  
58  
59  
60

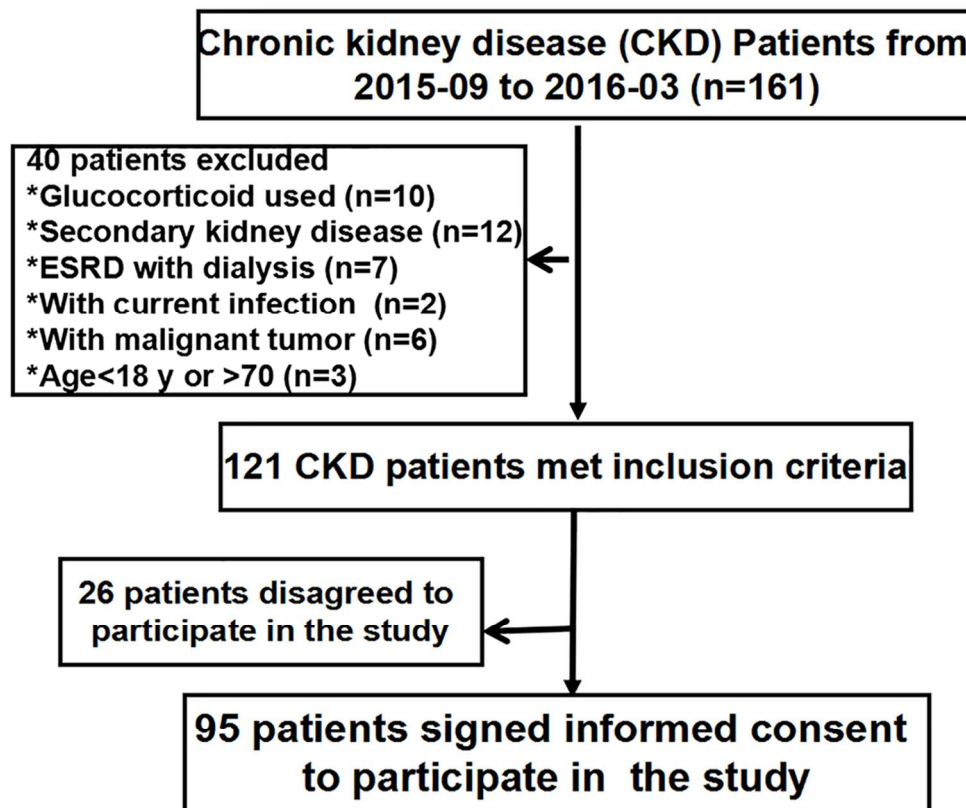

Figure 1. The flow chart of this study

99x83mm (300 x 300 DPI)

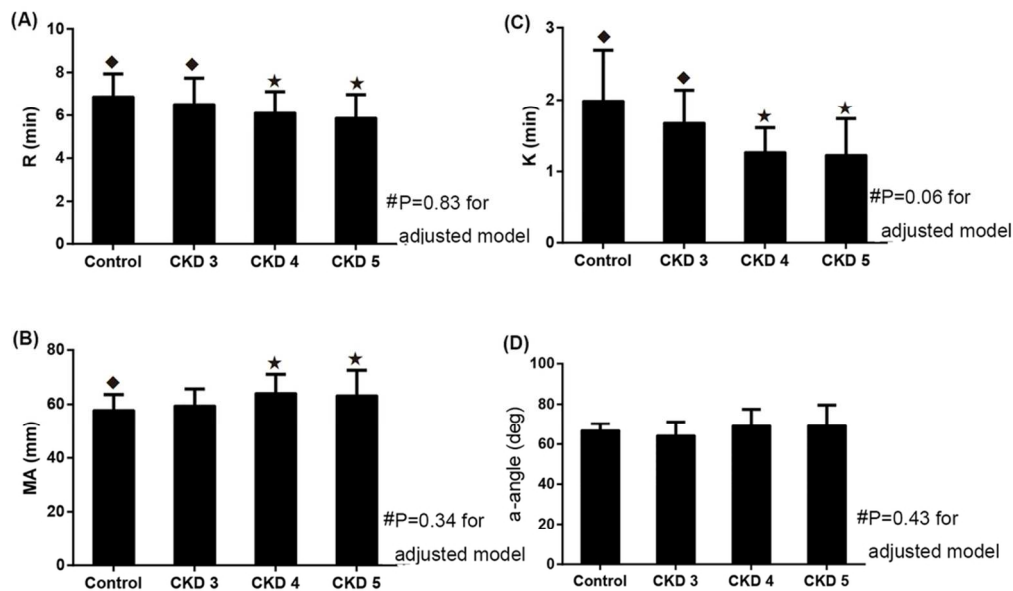

Figure 2. TEG parameters in healthy controls and chronic kidney disease patients.

(A) R value. (B) K value. (C) MA value. (D) α-angle value.

#P-values for the adjusted model. Data are adjusted for age, sex, history of diabetes, history of CHD, smoking status, MAP, BMI, hemoglobin, serum albumin, cholesterol, triglyceride, and UACR.

\*p < 0.05, vs control group for unadjusted values; ◆ p < 0.05, vs CKD 5 group for unadjusted values.

92x58mm (300 x 300 DPI)

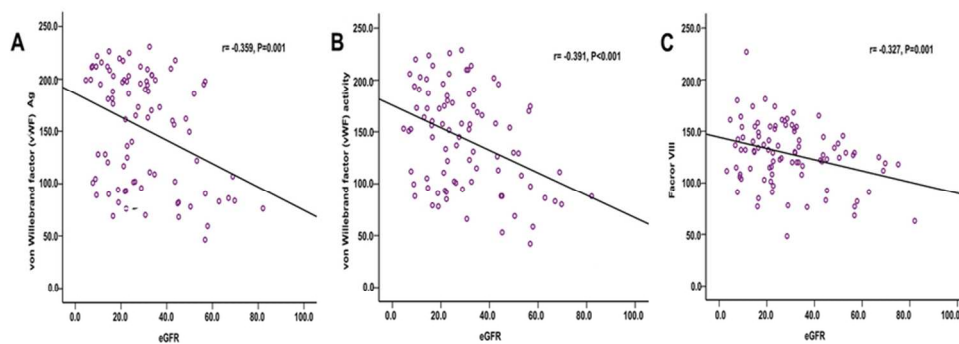

Figure 3. Correlation of vWF Ag, vWF:RCo, and FVIII levels with eGFR. (A) Correlation of vWF Ag with eGFR. (B) Correlation of vWF:RCo with eGFR. (C) Correlation of FVIII with eGFR. Regression lines: (A)  $vWF\ Ag = 186.3 - 1.12 \times eGFR$ . (B)  $vWF:RCo = 174.2 - 1.05 \times eGFR$ . (C)  $FVIII = 143.2 - 0.52 \times eGFR$ .

79x31mm (300 x 300 DPI)

**Table S1. Adjusted levels of procoagulant biomarkers by chronic kidney disease status.**

| Variables              | Healthy control  | CKD3             | CKD4             | CKD5             |
|------------------------|------------------|------------------|------------------|------------------|
| Platelet ( $10^9/l$ )  | 239.3 $\pm$ 72.4 | 218.1 $\pm$ 60.5 | 211.4 $\pm$ 57.9 | 186.3 $\pm$ 71.9 |
| ADP <sub>LTA</sub> (%) | 68.2 $\pm$ 10.5  | 68.4 $\pm$ 10.1  | 69.3 $\pm$ 2.0   | 73.6 $\pm$ 12.2  |
| Factor V (%)           | 108.3 $\pm$ 38.5 | 99.7 $\pm$ 35.0  | 108.0 $\pm$ 32.6 | 99.6 $\pm$ 40.3  |
| Factor VII(%)          | 78.8 $\pm$ 25.2  | 99.4 $\pm$ 23.4  | 104.0 $\pm$ 20.9 | 97.7 $\pm$ 27.4  |
| Factor VIII(%)         | 82.3 $\pm$ 31.6  | 118.2 $\pm$ 28.9 | 129.7 $\pm$ 27.1 | 141.1 $\pm$ 32.8 |
| VWF:Ag(%)              | 92.9 $\pm$ 51.4  | 131.0 $\pm$ 51.1 | 155.8 $\pm$ 46.2 | 182.9 $\pm$ 56.4 |
| vWF:RCo(%)             | 86.4 $\pm$ 44.1  | 120.9 $\pm$ 44.1 | 147.9 $\pm$ 40.0 | 170.0 $\pm$ 48.8 |
| Fibrinogen(g/l)        | 3.7 $\pm$ 1.0    | 3.2 $\pm$ 0.9    | 3.7 $\pm$ 0.9    | 4.2 $\pm$ 1.0    |
| Protein C(%)           | 98.2 $\pm$ 19.2  | 97.1 $\pm$ 16.6  | 92.5 $\pm$ 15.5  | 93.3 $\pm$ 19.6  |
| Protein S(%)           | 83.7 $\pm$ 29.1  | 87.1 $\pm$ 25.8  | 93.4 $\pm$ 23.5  | 99.4 $\pm$ 30.0  |
| AT III (%)             | 99.2 $\pm$ 12.9  | 104.7 $\pm$ 11.3 | 104.2 $\pm$ 10.4 | 99.2 $\pm$ 12.9  |
| D-dimer,(ng/ml)        | 362 $\pm$ 404    | 464 $\pm$ 367    | 505 $\pm$ 345    | 780 $\pm$ 422    |
| APTT(s)                | 40.5 $\pm$ 4.8   | 37.8 $\pm$ 3.9   | 37.5 $\pm$ 3.6   | 38.2 $\pm$ 4.8   |
| PT(s)                  | 137 $\pm$ 0.7    | 13.5 $\pm$ 0.5   | 13.5 $\pm$ 0.6   | 13.8 $\pm$ 0.7   |

Table S2. Unadjusted and adjusted levels of procoagulant biomarkers in patients without comorbidities

| Variables              | Unadjusted              |                          |                         |                         |        | Multivariable-adjusted* |                          |                          |                         |       |
|------------------------|-------------------------|--------------------------|-------------------------|-------------------------|--------|-------------------------|--------------------------|--------------------------|-------------------------|-------|
|                        | Healthy                 | CKD3                     | CKD4                    | CKD5                    | P      | Healthy                 | CKD3                     | CKD4                     | CKD5                    | P     |
|                        | control                 | (n=23)                   | (n=29)                  | (n=21)                  |        | control                 |                          |                          |                         |       |
| Platelet ( $10^9/l$ )  | 231.8±42.7              | 211.4±65.5               | 210.6±48.3              | 195.9±55.4              | 0.119  | 231.8±71.8              | 213.8±58.5               | 208.6±56.5               | 196.1±72.9              | 0.775 |
| ADP <sub>LTA</sub> (%) | 64.3±5.2                | 64.9±6.4                 | 71.5±8.1                | 74.8±8.5                | 0.009  | 64.4±10.2               | 65.5±9.1                 | 70.7±8.2                 | 75.6±11.7               | 0.255 |
| Factor V (%)           | 108.7±25.4              | 98.1±35.0                | 101.6±35.3              | 99.4±34.7               | 0.533  | 101.5±45.6              | 98.4±41.2                | 104.1±33.4               | 98.0±58.1               | 0.893 |
| Factor VII(%)          | 77.3±18.9 <sup>♦</sup>  | 97.9±16.9 <sup>*♦</sup>  | 103.1±16.6 <sup>*</sup> | 108.6±29.1 <sup>*</sup> | 0.002  | 82.7±25.8 <sup>♦</sup>  | 102.6±22.9 <sup>*</sup>  | 103.0±21.1 <sup>*♦</sup> | 98.3±28.8 <sup>*</sup>  | 0.139 |
| Factor VIII(%)         | 88.5±23.8 <sup>♦</sup>  | 114.7±26.6 <sup>*♦</sup> | 126.7±27.4 <sup>*</sup> | 136.2±33.5 <sup>*</sup> | <0.001 | 82.4±33.3 <sup>♦</sup>  | 117.3±29.5 <sup>*♦</sup> | 126.8±27.4 <sup>*</sup>  | 137.4±34.4 <sup>*</sup> | 0.006 |
| vWF:Ag(%)              | 105.1±45.4 <sup>♦</sup> | 124.1±55.8 <sup>♦</sup>  | 157.3±49.3 <sup>*</sup> | 177.0±47.8 <sup>*</sup> | 0.002  | 94.6±54.3 <sup>♦</sup>  | 127.9±52.7 <sup>*♦</sup> | 155.6±47.4 <sup>*</sup>  | 180.6±58.4 <sup>*</sup> | 0.037 |
| vWF:RCo(%)             | 100.0±32.3 <sup>♦</sup> | 114.7±46.4 <sup>♦</sup>  | 148.1±45.4 <sup>*</sup> | 167.5±44.7 <sup>*</sup> | 0.001  | 87.6±47.4 <sup>♦</sup>  | 118.8±45.8 <sup>*♦</sup> | 147.7±41.4 <sup>*</sup>  | 170.0±51.2 <sup>*</sup> | 0.016 |
| Fibrinogen(g/l)        | 3.0±0.8 <sup>♦</sup>    | 3.0±0.7 <sup>♦</sup>     | 3.6±0.6 <sup>*♦</sup>   | 4.3±1.1 <sup>*</sup>    | <0.001 | 3.5±1.1 <sup>♦</sup>    | 3.2±0.9 <sup>*♦</sup>    | 3.5±1.0 <sup>♦</sup>     | 4.1±0.9 <sup>*</sup>    | 0.032 |



|    |                 |                         |                        |                      |            |        |                      |            |           |            |       |
|----|-----------------|-------------------------|------------------------|----------------------|------------|--------|----------------------|------------|-----------|------------|-------|
| 1  |                 |                         |                        |                      |            |        |                      |            |           |            |       |
| 2  |                 |                         |                        |                      |            |        |                      |            |           |            |       |
| 3  |                 |                         |                        |                      |            |        |                      |            |           |            |       |
| 4  |                 |                         |                        |                      |            |        |                      |            |           |            |       |
| 5  |                 |                         |                        |                      |            |        |                      |            |           |            |       |
| 6  | Protein C(%)    | 106.3±17.9 <sup>♦</sup> | 98.5±20.3 <sup>♦</sup> | 90.4±16.5            | 86.5±14.9* | 0.029  | 93.4±20.6            | 96.2±18.3  | 89.9±16.5 | 93.7±21.6  | 0.629 |
| 7  |                 |                         |                        |                      |            |        |                      |            |           |            |       |
| 8  | Protein S(%)    | 76.9±24.8               | 86.7±25.3              | 92.8±18.0            | 97.3±25.4  | 0.171  | 81.2±29.3            | 86.1±25.0  | 91.2±23.5 | 98.6±30.0  | 0.651 |
| 9  |                 |                         |                        |                      |            |        |                      |            |           |            |       |
| 10 |                 |                         |                        |                      |            |        |                      |            |           |            |       |
| 11 | AT III (%)      | 100.9±8.9               | 103.6±10.9             | 106.1±10.4           | 103.7±12.2 | 0.539  | 97.8±12.0            | 104.2±10.0 | 105.9±9.6 | 102.2±12.5 | 0.178 |
| 12 |                 |                         |                        |                      |            |        |                      |            |           |            |       |
| 13 |                 |                         |                        |                      |            |        |                      |            |           |            |       |
| 14 | D-dimer,(ng/ml) | 268±124 <sup>♦</sup>    | 419±297 <sup>♦</sup>   | 420±186 <sup>♦</sup> | 865±531*   | <0.001 | 373±300 <sup>♦</sup> | 464±335    | 419±323   | 799±40*    | 0.008 |
| 15 |                 |                         |                        |                      |            |        |                      |            |           |            |       |
| 16 | APTT(s)         | 38.9±4.8                | 37.9±3.4               | 37.9±3.9             | 39.4±3.3   | 0.506  | 41.2±4.7             | 38.2±3.8   | 37.6±3.8  | 38.1±4.5   | 0.138 |
| 17 |                 |                         |                        |                      |            |        |                      |            |           |            |       |
| 18 |                 |                         |                        |                      |            |        |                      |            |           |            |       |
| 19 | PT(s)           | 13.5±0.6                | 13.6±0.6               | 13.5±0.6             | 13.7±0.5   | 0.655  | 13.6±0.7             | 13.5±0.6   | 13.5±0.6  | 13.6±0.7   | 0.920 |
| 20 |                 |                         |                        |                      |            |        |                      |            |           |            |       |

21 Data are adjusted for age, sex, MAP, BMI, hemoglobin, serum albumin, cholesterol, triglyceride, and UACR.

22  
23 AT III=antithrombin III; APTT=activated partial thromboplastin time; PT=prothrombin time; LTA=Light transmittance aggregometry.

24  
25  
26  
27 \*p<0.05, vs control group; <sup>♦</sup>p<0.05, vs CKD 5 group.

1  
2  
3  
4  
5  
6  
7  
8  
9  
10  
11  
12  
13  
14  
15  
16  
17  
18  
19  
20  
21  
22  
23  
24  
25  
26  
27  
28  
29  
30  
31  
32  
33  
34  
35  
36  
37  
38  
39  
40  
41  
42  
43  
44  
45  
46  
47

For peer review only

**STROBE 2007 (v4) checklist of items to be included in reports of observational studies in epidemiology\***  
**Checklist for cohort, case-control, and cross-sectional studies (combined)**

| Section/Topic             | Item # | Recommendation                                                                                                                                                                                                                                                                                                                                                                                                                                                         | Reported on page # |
|---------------------------|--------|------------------------------------------------------------------------------------------------------------------------------------------------------------------------------------------------------------------------------------------------------------------------------------------------------------------------------------------------------------------------------------------------------------------------------------------------------------------------|--------------------|
| Title and abstract        | 1      | (a) Indicate the study's design with a commonly used term in the title or the abstract                                                                                                                                                                                                                                                                                                                                                                                 | Page 2             |
|                           |        | (b) Provide in the abstract an informative and balanced summary of what was done and what was found                                                                                                                                                                                                                                                                                                                                                                    | Page 2             |
| <b>Introduction</b>       |        |                                                                                                                                                                                                                                                                                                                                                                                                                                                                        |                    |
| Background/rationale      | 2      | Explain the scientific background and rationale for the investigation being reported                                                                                                                                                                                                                                                                                                                                                                                   | Page 4             |
| Objectives                | 3      | State specific objectives, including any pre-specified hypotheses                                                                                                                                                                                                                                                                                                                                                                                                      | Page 4             |
| <b>Methods</b>            |        |                                                                                                                                                                                                                                                                                                                                                                                                                                                                        |                    |
| Study design              | 4      | Present key elements of study design early in the paper                                                                                                                                                                                                                                                                                                                                                                                                                | Page 5             |
| Setting                   | 5      | Describe the setting, locations, and relevant dates, including periods of recruitment, exposure, follow-up, and data collection                                                                                                                                                                                                                                                                                                                                        | Page 5-7           |
| Participants              | 6      | (a) <i>Cohort study</i> —Give the eligibility criteria, and the sources and methods of selection of participants. Describe methods of follow-up<br><i>Case-control study</i> —Give the eligibility criteria, and the sources and methods of case ascertainment and control selection. Give the rationale for the choice of cases and controls<br><i>Cross-sectional study</i> —Give the eligibility criteria, and the sources and methods of selection of participants | Page 5             |
|                           |        | (b) <i>Cohort study</i> —For matched studies, give matching criteria and number of exposed and unexposed<br><i>Case-control study</i> —For matched studies, give matching criteria and the number of controls per case                                                                                                                                                                                                                                                 |                    |
| Variables                 | 7      | Clearly define all outcomes, exposures, predictors, potential confounders, and effect modifiers. Give diagnostic criteria, if applicable                                                                                                                                                                                                                                                                                                                               | Page 5-7           |
| Data sources/ measurement | 8*     | For each variable of interest, give sources of data and details of methods of assessment (measurement). Describe comparability of assessment methods if there is more than one group                                                                                                                                                                                                                                                                                   | Page 5-7           |
| Bias                      | 9      | Describe any efforts to address potential sources of bias                                                                                                                                                                                                                                                                                                                                                                                                              | Page 8             |
| Study size                | 10     | Explain how the study size was arrived at                                                                                                                                                                                                                                                                                                                                                                                                                              | Page 5             |
| Quantitative variables    | 11     | Explain how quantitative variables were handled in the analyses. If applicable, describe which groupings were chosen and why                                                                                                                                                                                                                                                                                                                                           | Page 6,7           |
| Statistical methods       | 12     | (a) Describe all statistical methods, including those used to control for confounding                                                                                                                                                                                                                                                                                                                                                                                  | Page 8             |
|                           |        | (b) Describe any methods used to examine subgroups and interactions                                                                                                                                                                                                                                                                                                                                                                                                    | Page 8             |
|                           |        | (c) Explain how missing data were addressed                                                                                                                                                                                                                                                                                                                                                                                                                            |                    |
|                           |        | (d) <i>Cohort study</i> —If applicable, explain how loss to follow-up was addressed<br><i>Case-control study</i> —If applicable, explain how matching of cases and controls was addressed                                                                                                                                                                                                                                                                              | Page 8             |

|                          |     |                                                                                                                                                                                                                                                                                                                                                                                                               |                        |
|--------------------------|-----|---------------------------------------------------------------------------------------------------------------------------------------------------------------------------------------------------------------------------------------------------------------------------------------------------------------------------------------------------------------------------------------------------------------|------------------------|
|                          |     | <i>Cross-sectional study</i> —If applicable, describe analytical methods taking account of sampling strategy                                                                                                                                                                                                                                                                                                  |                        |
|                          |     | (e) Describe any sensitivity analyses                                                                                                                                                                                                                                                                                                                                                                         |                        |
| <b>Results</b>           |     |                                                                                                                                                                                                                                                                                                                                                                                                               |                        |
| Participants             | 13* | (a) Report numbers of individuals at each stage of study—eg numbers potentially eligible, examined for eligibility, confirmed eligible, included in the study, completing follow-up, and analysed<br>(b) Give reasons for non-participation at each stage<br>(c) Consider use of a flow diagram                                                                                                               | Page 8,9<br><br>Page 6 |
| Descriptive data         | 14* | (a) Give characteristics of study participants (eg demographic, clinical, social) and information on exposures and potential confounders<br>(b) Indicate number of participants with missing data for each variable of interest<br>(c) <i>Cohort study</i> —Summarise follow-up time (eg, average and total amount)                                                                                           | Page 8,9               |
| Outcome data             | 15* | <i>Cohort study</i> —Report numbers of outcome events or summary measures over time<br><i>Case-control study</i> —Report numbers in each exposure category, or summary measures of exposure<br><i>Cross-sectional study</i> —Report numbers of outcome events or summary measures                                                                                                                             | Page 14                |
| Main results             | 16  | (a) Give unadjusted estimates and, if applicable, confounder-adjusted estimates and their precision (eg, 95% confidence interval). Make clear which confounders were adjusted for and why they were included<br>(b) Report category boundaries when continuous variables were categorized<br>(c) If relevant, consider translating estimates of relative risk into absolute risk for a meaningful time period | Page 11-15             |
| Other analyses           | 17  | Report other analyses done—eg analyses of subgroups and interactions, and sensitivity analyses                                                                                                                                                                                                                                                                                                                |                        |
| <b>Discussion</b>        |     |                                                                                                                                                                                                                                                                                                                                                                                                               |                        |
| Key results              | 18  | Summarise key results with reference to study objectives                                                                                                                                                                                                                                                                                                                                                      | Page 16                |
| Limitations              | 19  | Discuss limitations of the study, taking into account sources of potential bias or imprecision. Discuss both direction and magnitude of any potential bias                                                                                                                                                                                                                                                    | Page 18                |
| Interpretation           | 20  | Give a cautious overall interpretation of results considering objectives, limitations, multiplicity of analyses, results from similar studies, and other relevant evidence                                                                                                                                                                                                                                    | Page 16-18             |
| Generalisability         | 21  | Discuss the generalisability (external validity) of the study results                                                                                                                                                                                                                                                                                                                                         | Page 17                |
| <b>Other information</b> |     |                                                                                                                                                                                                                                                                                                                                                                                                               |                        |
| Funding                  | 22  | Give the source of funding and the role of the funders for the present study and, if applicable, for the original study on which the present article is based                                                                                                                                                                                                                                                 | Page 19                |

\*Give information separately for cases and controls in case-control studies and, if applicable, for exposed and unexposed groups in cohort and cross-sectional studies.

**Note:** An Explanation and Elaboration article discusses each checklist item and gives methodological background and published examples of transparent reporting. The STROBE checklist is best used in conjunction with this article (freely available on the Web sites of PLoS Medicine at <http://www.plosmedicine.org/>, Annals of Internal Medicine at <http://www.annals.org/>, and Epidemiology at <http://www.epidem.com/>). Information on the STROBE Initiative is available at [www.strobe-statement.org](http://www.strobe-statement.org).
