# Supplementary material for: Blood coagulation system in patients with chronic kidney disease: a prospective observational study
Source: PubMed Central journal article supplement — BMJ Open. 2017 Jun 1;7(5):e014294. doi: 10.1136/bmjopen-2016-014294 (PMC5541338; doi:10.1136/bmjopen-2016-014294), 2017-06-01
Supplement: bmjopen-2016-014294supp001.pdf [file bmjopen-2016-014294supp001.pdf]

**Table S1. Adjusted levels of procoagulant biomarkers by chronic kidney disease status.**

| Variables              | Healthy<br>control | CKD3             | CKD4             | CKD5             |
|------------------------|--------------------|------------------|------------------|------------------|
| Platelet ( $10^9/l$ )  | 239.3 $\pm$ 72.4   | 218.1 $\pm$ 60.5 | 211.4 $\pm$ 57.9 | 186.3 $\pm$ 71.9 |
| ADP <sub>LTA</sub> (%) | 68.2 $\pm$ 10.5    | 68.4 $\pm$ 10.1  | 69.3 $\pm$ 2.0   | 73.6 $\pm$ 12.2  |
| Factor V (%)           | 108.3 $\pm$ 38.5   | 99.7 $\pm$ 35.0  | 108.0 $\pm$ 32.6 | 99.6 $\pm$ 40.3  |
| Factor VII(%)          | 78.8 $\pm$ 25.2    | 99.4 $\pm$ 23.4  | 104.0 $\pm$ 20.9 | 97.7 $\pm$ 27.4  |
| Factor VIII(%)         | 82.3 $\pm$ 31.6    | 118.2 $\pm$ 28.9 | 129.7 $\pm$ 27.1 | 141.1 $\pm$ 32.8 |
| VWF:Ag(%)              | 92.9 $\pm$ 51.4    | 131.0 $\pm$ 51.1 | 155.8 $\pm$ 46.2 | 182.9 $\pm$ 56.4 |
| vWF:RCo(%)             | 86.4 $\pm$ 44.1    | 120.9 $\pm$ 44.1 | 147.9 $\pm$ 40.0 | 170.0 $\pm$ 48.8 |
| Fibrinogen(g/l)        | 3.7 $\pm$ 1.0      | 3.2 $\pm$ 0.9    | 3.7 $\pm$ 0.9    | 4.2 $\pm$ 1.0    |
| Protein C(%)           | 98.2 $\pm$ 19.2    | 97.1 $\pm$ 16.6  | 92.5 $\pm$ 15.5  | 93.3 $\pm$ 19.6  |
| Protein S(%)           | 83.7 $\pm$ 29.1    | 87.1 $\pm$ 25.8  | 93.4 $\pm$ 23.5  | 99.4 $\pm$ 30.0  |
| AT III (%)             | 99.2 $\pm$ 12.9    | 104.7 $\pm$ 11.3 | 104.2 $\pm$ 10.4 | 99.2 $\pm$ 12.9  |
| D-dimer,(ng/ml)        | 362 $\pm$ 404      | 464 $\pm$ 367    | 505 $\pm$ 345    | 780 $\pm$ 422    |
| APTT(s)                | 40.5 $\pm$ 4.8     | 37.8 $\pm$ 3.9   | 37.5 $\pm$ 3.6   | 38.2 $\pm$ 4.8   |
| PT(s)                  | 137 $\pm$ 0.7      | 13.5 $\pm$ 0.5   | 13.5 $\pm$ 0.6   | 13.8 $\pm$ 0.7   |

**Table S2. Unadjusted and adjusted levels of procoagulant biomarkers in patients without comorbidities**

| Variables              | Unadjusted              |                         |                      |             | P      | Multivariable-adjusted* |                         |                         |             |       |
|------------------------|-------------------------|-------------------------|----------------------|-------------|--------|-------------------------|-------------------------|-------------------------|-------------|-------|
|                        | Healthy control         | CKD3 (n=23)             | CKD4 (n=29)          | CKD5 (n=21) |        | Healthy control         | CKD3                    | CKD4                    | CKD5        | P     |
| Platelet ( $10^9/l$ )  | 231.8±42.7              | 211.4±65.5              | 210.6±48.3           | 195.9±55.4  | 0.119  | 231.8±71.8              | 213.8±58.5              | 208.6±56.5              | 196.1±72.9  | 0.775 |
| ADP <sub>LTA</sub> (%) | 64.3±5.2                | 64.9±6.4                | 71.5±8.1             | 74.8±8.5    | 0.009  | 64.4±10.2               | 65.5±9.1                | 70.7±8.2                | 75.6±11.7   | 0.255 |
| Factor V (%)           | 108.7±25.4              | 98.1±35.0               | 101.6±35.3           | 99.4±34.7   | 0.533  | 101.5±45.6              | 98.4±41.2               | 104.1±33.4              | 98.0±58.1   | 0.893 |
| Factor VII(%)          | 77.3±18.9 <sup>♦</sup>  | 97.9±16.9 <sup>♦</sup>  | 103.1±16.6*          | 108.6±29.1* | 0.002  | 82.7±25.8 <sup>♦</sup>  | 102.6±22.9*             | 103.0±21.1 <sup>♦</sup> | 98.3±28.8*  | 0.139 |
| Factor VIII(%)         | 88.5±23.8 <sup>♦</sup>  | 114.7±26.6 <sup>♦</sup> | 126.7±27.4*          | 136.2±33.5* | <0.001 | 82.4±33.3 <sup>♦</sup>  | 117.3±29.5 <sup>♦</sup> | 126.8±27.4*             | 137.4±34.4* | 0.006 |
| VWF:Ag(%)              | 105.1±45.4 <sup>♦</sup> | 124.1±55.8 <sup>♦</sup> | 157.3±49.3*          | 177.0±47.8* | 0.002  | 94.6±54.3 <sup>♦</sup>  | 127.9±52.7 <sup>♦</sup> | 155.6±47.4*             | 180.6±58.4* | 0.037 |
| vWF:RCo(%)             | 100.0±32.3 <sup>♦</sup> | 114.7±46.4 <sup>♦</sup> | 148.1±45.4*          | 167.5±44.7* | 0.001  | 87.6±47.4 <sup>♦</sup>  | 118.8±45.8 <sup>♦</sup> | 147.7±41.4*             | 170.0±51.2* | 0.016 |
| Fibrinogen(g/l)        | 3.0±0.8 <sup>♦</sup>    | 3.0±0.7 <sup>♦</sup>    | 3.6±0.6 <sup>♦</sup> | 4.3±1.1*    | <0.001 | 3.5±1.1 <sup>♦</sup>    | 3.2±0.9 <sup>♦</sup>    | 3.5±1.0 <sup>♦</sup>    | 4.1±0.9*    | 0.032 |

|                 |                         |                        |                       |            |        |                      |            |           |            |       |
|-----------------|-------------------------|------------------------|-----------------------|------------|--------|----------------------|------------|-----------|------------|-------|
| Protein C(%)    | 106.3±17.9 <sup>◆</sup> | 98.5±20.3 <sup>◆</sup> | 90.4±16.5             | 86.5±14.9* | 0.029  | 93.4±20.6            | 96.2±18.3  | 89.9±16.5 | 93.7±21.6  | 0.629 |
| Protein S(%)    | 76.9±24.8               | 86.7±25.3              | 92.8±18.0             | 97.3±25.4  | 0.171  | 81.2±29.3            | 86.1±25.0  | 91.2±23.5 | 98.6±30.0  | 0.651 |
| AT III (%)      | 100.9±8.9               | 103.6±10.9             | 106.1±10.4            | 103.7±12.2 | 0.539  | 97.8±12.0            | 104.2±10.0 | 105.9±9.6 | 102.2±12.5 | 0.178 |
| D-dimer,(ng/ml) | 268±124 <sup>◆</sup>    | 419±297 <sup>◆</sup>   | 420±186* <sup>◆</sup> | 865±531*   | <0.001 | 373±300 <sup>◆</sup> | 464±335    | 419±323   | 799±40*    | 0.008 |
| APTT(s)         | 38.9±4.8                | 37.9±3.4               | 37.9±3.9              | 39.4±3.3   | 0.506  | 41.2±4.7             | 38.2±3.8   | 37.6±3.8  | 38.1±4.5   | 0.138 |
| PT(s)           | 13.5±0.6                | 13.6±0.6               | 13.5±0.6              | 13.7±0.5   | 0.655  | 13.6±0.7             | 13.5±0.6   | 13.5±0.6  | 13.6±0.7   | 0.920 |

Data are adjusted for age, sex, MAP, BMI, hemoglobin, serum albumin, cholesterol, triglyceride, and UACR.

AT III=antithrombin III; APTT=activated partial thromboplastin time; PT=prothrombin time; LTA=Light transmittance aggregometry.

\*p<0.05, vs control group; <sup>◆</sup>p<0.05, vs CKD 5 group.
